# Supplementary material for: Genome reorganization of the GmSHMT gene family in soybean showed a lack of functional redundancy in resistance to soybean cyst nematode
Source: PubMed Central journal article supplement (PMC6365578; doi:10.1038/s41598-018-37815-w), 2019-02-06
Supplement: 41598_2018_37815_MOESM1_ESM.pdf [file 41598_2018_37815_MOESM1_ESM.pdf]

**Genome reorganization of the *GmSHMT* gene family in soybean showed a lack of functional redundancy in resistance to soybean cyst nematode**

Naoufal Lakhssassi<sup>1</sup>, Gunvant Patil<sup>2,3\*</sup>, Sarbottam Piya<sup>4\*</sup>, Zhou Zhou<sup>1\*</sup>, Azam Baharlouei<sup>1</sup>, My Abdelmajid Kassem<sup>5</sup>, David A Lightfoot<sup>1</sup>, Tarek Hewezi<sup>4</sup>, Abdelali Barakat<sup>6</sup>, Henry T. Nguyen<sup>2</sup>, and Khalid Meksem<sup>1</sup>

<sup>1</sup>Department of Plant, Soil and Agricultural Systems, Southern Illinois University, Carbondale, IL 62901, USA. <sup>2</sup>Division of Plant Sciences, University of Missouri, Columbia, MO, 65201, USA. <sup>3</sup>Department of Agronomy and Plant Genetics, University of Minnesota, St. Paul, MN 55108, USA. <sup>4</sup>Department of Plant Sciences, University of Tennessee, Knoxville, TN, 37996, USA. <sup>5</sup>Department of Biological Sciences, Fayetteville State University, NC 28301, USA. <sup>6</sup>Department of Biology, University of South Dakota, Vermillion, SD 57069, USA.

\*These authors contribute equally to this work. Correspondence to meksem@siu.edu.

GmSHMT02m  
GmSHMT04n  
GmSHMT05c  
GmSHMT06n  
GmSHMT08c  
GmSHMT08n  
GmSHMT08m  
GmSHMT09m  
GmSHMT12n  
GmSHMT13ch  
GmSHMT14n  
GmSHMT15ch  
GmSHMT18m

.....  
10 20 30 40 50 60  
MVDHDLQQETQKDSYISTLCSLLNHYL PFFHSPVLSVSLFPSSRQNAHFPI SHFPFLVQP  
.....  
.....  
.....  
.....  
.....  
.....  
.....  
.....  
.....  
.....  
.....  
.....  
.....  
.....

GmSHMT02m  
GmSHMT04n  
GmSHMT05c  
GmSHMT06n  
GmSHMT08c  
GmSHMT08n  
GmSHMT08m  
GmSHMT09m  
GmSHMT12n  
GmSHMT13ch  
GmSHMT14n  
GmSHMT15ch  
GmSHMT18m

.....LAMAMSLRRLSP.....S...KPLRL.....  
70 80 90 100 110 120  
.....MAMALP LRRLES.....TLNKPLA.....  
MDSQPG LSLGLE VPLSEP AAPLCDTTSV LWR LFNKRHP I KEE.....EEEDEDYGETINF  
.....  
MDSQPG LSLGLE ATLSSEP AAPLSDTTSV PWR LFNERHPKKEEQEEDGGETINF  
MAPMPNGR FKS EPTSTE E...IMNYEI KML PTFKNEHIRTH...ISIP PQQTQ QHSLF  
SHPQSN LSLGFE SSHASP...PRRSDPPV PLQLMEPQTENGNLDVESDDDDKEVEEFR  
.....MAMAMA LRRLES.....SIDKPLRP  
.....MAMAMA LGRLES.....EFNKPLRP  
SHPQSN LSLGFE SSHASP...PRRSDPPV PLQLMEPQTENGNLDVESDDDED-KEVEEFR  
.....MQACTTME SLQQQP...IWTKGLNFPKGYGSNNGFL.....PQ  
.....MAMALA LRRLN.....KPFPS  
.....MAMAMA LRRLES.....SIDKPLRP

GmSHMT02m  
GmSHMT04n  
GmSHMT05c  
GmSHMT06n  
GmSHMT08c  
GmSHMT08n  
GmSHMT08m  
GmSHMT09m  
GmSHMT12n  
GmSHMT13ch  
GmSHMT14n  
GmSHMT15ch  
GmSHMT18m

.....L-NARSIYKSEL P.....SKRVYVKDKVGA.....WLNQPLEVADPEIADIE  
130 140 150 160 170 180  
.....SATSIYHRMES.....ELSAQEKDKSRA...DWIKQLNDPLETIDPEIADIE  
MDQSVK R KIEGH-QQF-OFPE SKRVA VDSVVG.....WVWG PLGLG VADPEIF YMG  
.....MDQRVK R KIEGHQQQF-OFPE SKRVA VDSVVG.....WVWG PLGLG VADPEIFDI MQ  
.....SLLAFRSBLTLIHSEFP...P-FMDPVSV.....WVWG PLGLG VADPEI HDLIE  
ILGHSMCLK RRRDCDSSSSAAA AKRVSEYEPDL D ARKAAVRA WGC PLLSIADPDIHEME  
.....LFNAGSEL YKSSLP...DEAVYDKERP GV...TWP KQLNAPLEVV DPEIADIE  
.....LFNAGSEL YKSSLP...AEAA YONEK...SCDTE LNA PLLEVV DPEIADIE  
ILGHSMCLK RRRDCDSSSSAAA AKRVSEYEPDL D ARKAAVRA WGC PLLSIADP DVHEI ME  
VRFONI KPSKASHVEASLV TGKPSV PFSVPEIIG...DGSSFLDYGLSEADPDVRAID  
.....NATSIY-RQES...ELSAHEKHKSR A...DWIKQLNDP LEAIDPEIADIE  
.....LFNAGSEL YKSSLP...DEAVYDKERP GV...TWP KQLNASLEVV DPEIADIE

GmSHMT02m  
GmSHMT04n  
GmSHMT05c  
GmSHMT06n  
GmSHMT08c  
GmSHMT08n  
GmSHMT08m  
GmSHMT09m  
GmSHMT12n  
GmSHMT13ch  
GmSHMT14n  
GmSHMT15ch  
GmSHMT18m

KEKARQFKGIELIASENFTSRAVMEALGSEVLTNKYSEGMPGARYYGGNEYID EIE TL C Q K  
190 200 210 220 230 240  
LEKARQWKGFELI PSENFTSLSVMQA VGSVM TNKYSEGYPGARYYGGNEYID MAETL C Q K  
KEKARQFKGIELIASENF VCRAVMEALGSEHL TNKYSEGMPGAKYYTGNQYID EIE FL C C Q  
KEKH R QCRGIELIASENFTSFAVIALGSEAL TNKYSEGMPGNRYYGGNEFI DQIENL C R S  
KEKRRQFKGIELIASENF VCRAVMEALGSEHL TNKYSEGMPGAKYYTGNQYID EIE FL C C Q  
KEKR R QCRGIELIASENFTSFAVIALGSEAL TNKYSEGMPGNRYYGGNEYI DQIENL C R S  
KEKK R QCFGIELIASENF VCRAVMEALGSEHL TNKYSEGMPGSRYYGGN QYID EIE TL C CE  
LEKARQWKGFELI PSENFTSLSVMQA VGSVM TNKYSEGYPGARYYGGNEYID MAETL C Q K  
LEKARQWKGFELI PSENFTSLSVMQA VGSVM TNKYSEGYPGARYYGGNEYID MAETL C Q K  
KEKK R QCFGIELIASENF VCRAVMEALGSEHL TNKYSEGMPGNRYYGGNEYI DQIENL C CE  
KEKDRQFKSLELIASENFTSRAVMEAVGSECL TNKYSEG L P G K R Y Y G G N E Y I D E L E I L C Q Q  
LEKARQWKGFELI PSENFTSLSVMQA VGSVM TNKYSEGYPGARYYGGNEYID MAETL C Q K  
LEKARQWKGFELI PSENFTSLSVMQA VGSVM TNKYSEGYPGARYYGGNEYID MAETL C Q K  
LEKARQWKGFELI PSENFTSLSVMQA VGSVM TNKYSEGYPGARYYGGNEYID MAETL C Q K

GmSHMT02m  
GmSHMT04n  
GmSHMT05c  
GmSHMT06n  
GmSHMT08c  
GmSHMT08n  
GmSHMT08m  
GmSHMT09m  
GmSHMT12n  
GmSHMT13ch  
GmSHMT14n  
GmSHMT15ch  
GmSHMT18m

RALEAFRLDPAKWGVNVQPLSGSPANFAVYTALLKPHDRIMGLDLPFSGGHL SHGYTDT  
250 260 270 280 290 300  
RALEAFRLDPAKWGVNVQSLSGSPSNFQVYTALLKPHERIMALDLPFHGGHLSHG YQTDT  
RALLA FDLHENN WGVNVQPYYSCTSANFAVYTGLLHFGDRIMGLDSPFSGGHL SHGYT LGG  
RALQA FHLDAQS WGVNVQPYYSCTSPANFAVYTAVL NPHDRIMGLDLPFSGGHL T HGYT SGG  
RALLA FDLHENN WGVNVQPYYSCTSANFAVYTGLLHFGDRIMGLDSPFSGGHL SHGYT LGG  
RALQA FHLDAQS WGVNVQPYYSCTSPANFAVYTAVL NPHDRIMGLDLPFSGGHL T HGYT SGG  
RALEAFRLDPAKWGVNVQPLSGSPANFHVYTALLKPHERIMALDLPFHGGHLSHG YQTDT  
RALEAFRLDPAKWGVNVQPLSGSPANFQVYTALLKPHDRIMGLDLPFHGGHLSHG YQTDT  
RALNA FGLDFK WGVNVQPYYSCTSANFAVYTGLLLPFGDRIMGLDTPFSGGNTSHGYT PNG  
RALA AFHVDENK WGVNVQTLSGSPANFAVYTAVL KPHDRIMGLDLPFHGGHLSHG FMT PK  
RALEAFQLDPAKWGVNVQSLSGSPSNFQVYTALLKPHERIMALDLPFHGGHLSHG YQTDT  
RALEAFRLDPAKWGVNVQPLSGSPANFHVYTALLKPHERIMALDLPFHGGHLSHG YQTDT

GmSHMT02m  
GmSHMT04n  
GmSHMT05c  
GmSHMT06n  
GmSHMT08c  
GmSHMT08n  
GmSHMT08m  
GmSHMT09m  
GmSHMT12n  
GmSHMT13ch  
GmSHMT14n  
GmSHMT15ch  
GmSHMT18m

KKVSAVSIFPETLPYKVN ESTGYIDYDQLEEKSAV LFRPKLIVAGASAYARLYDYARVR  
310 320 330 340 350 360  
KKISAVSIFPETMPYRLNESTGYIDYDQLEEKSAV LFRPKLIVAGASAYARLYDYARVR  
KKVSAASIFPETLPYKVN PQSGYIDYDKLEEKALDFRPKILICGGSSYPREWDYARFR  
KKISATSIFYPESLPYKVN STTGYIDYDRLEEKALDFRPKILICGGSSYPREWDYARFR  
KKVSAASIFPETLPYKVN PQSGYIDYDKLEEKALDFRPKILICGGSSYPREWDYARFR  
KKISATSIFYPESLPYKVN STTGYIDYDRLEEKALDFRPKILICGGSSYPREWDYARFR  
KKVSGASIFPESLPYKVN PQTGYIDYDKLEERALDFRPKILICGGSSYPREWDYARFR  
KKISAVSIFPETMPYRLNESTGYIDYDQMEKSA T LFRPKLIVAGASAYARLYDYERVR  
NKVSAVSLFFPETMPYRLNENTGHIDYDQLESTAKLFRPKLIVAGATAYARLYDYARIR  
KKVSGASIFPESLPYKVN PQTGYIDYDKLEERALDFRPKILICGGSSYPREWDYARFR  
KRVSATSIFYPESMPYRLDESTGLIDYDML EKTAT LFRPKLIVAGASAYARLDIYPRMRKL  
KKISAVSIFPETMPYRLNESTGYIDYDQLEEKSA LFRPKLIVAGASAYARLYDYARVR  
KKISAVSIFPETMPYRLNESTGYIDYDQMEKSA T LFRPKLIVAGASAYARLYDYERVR

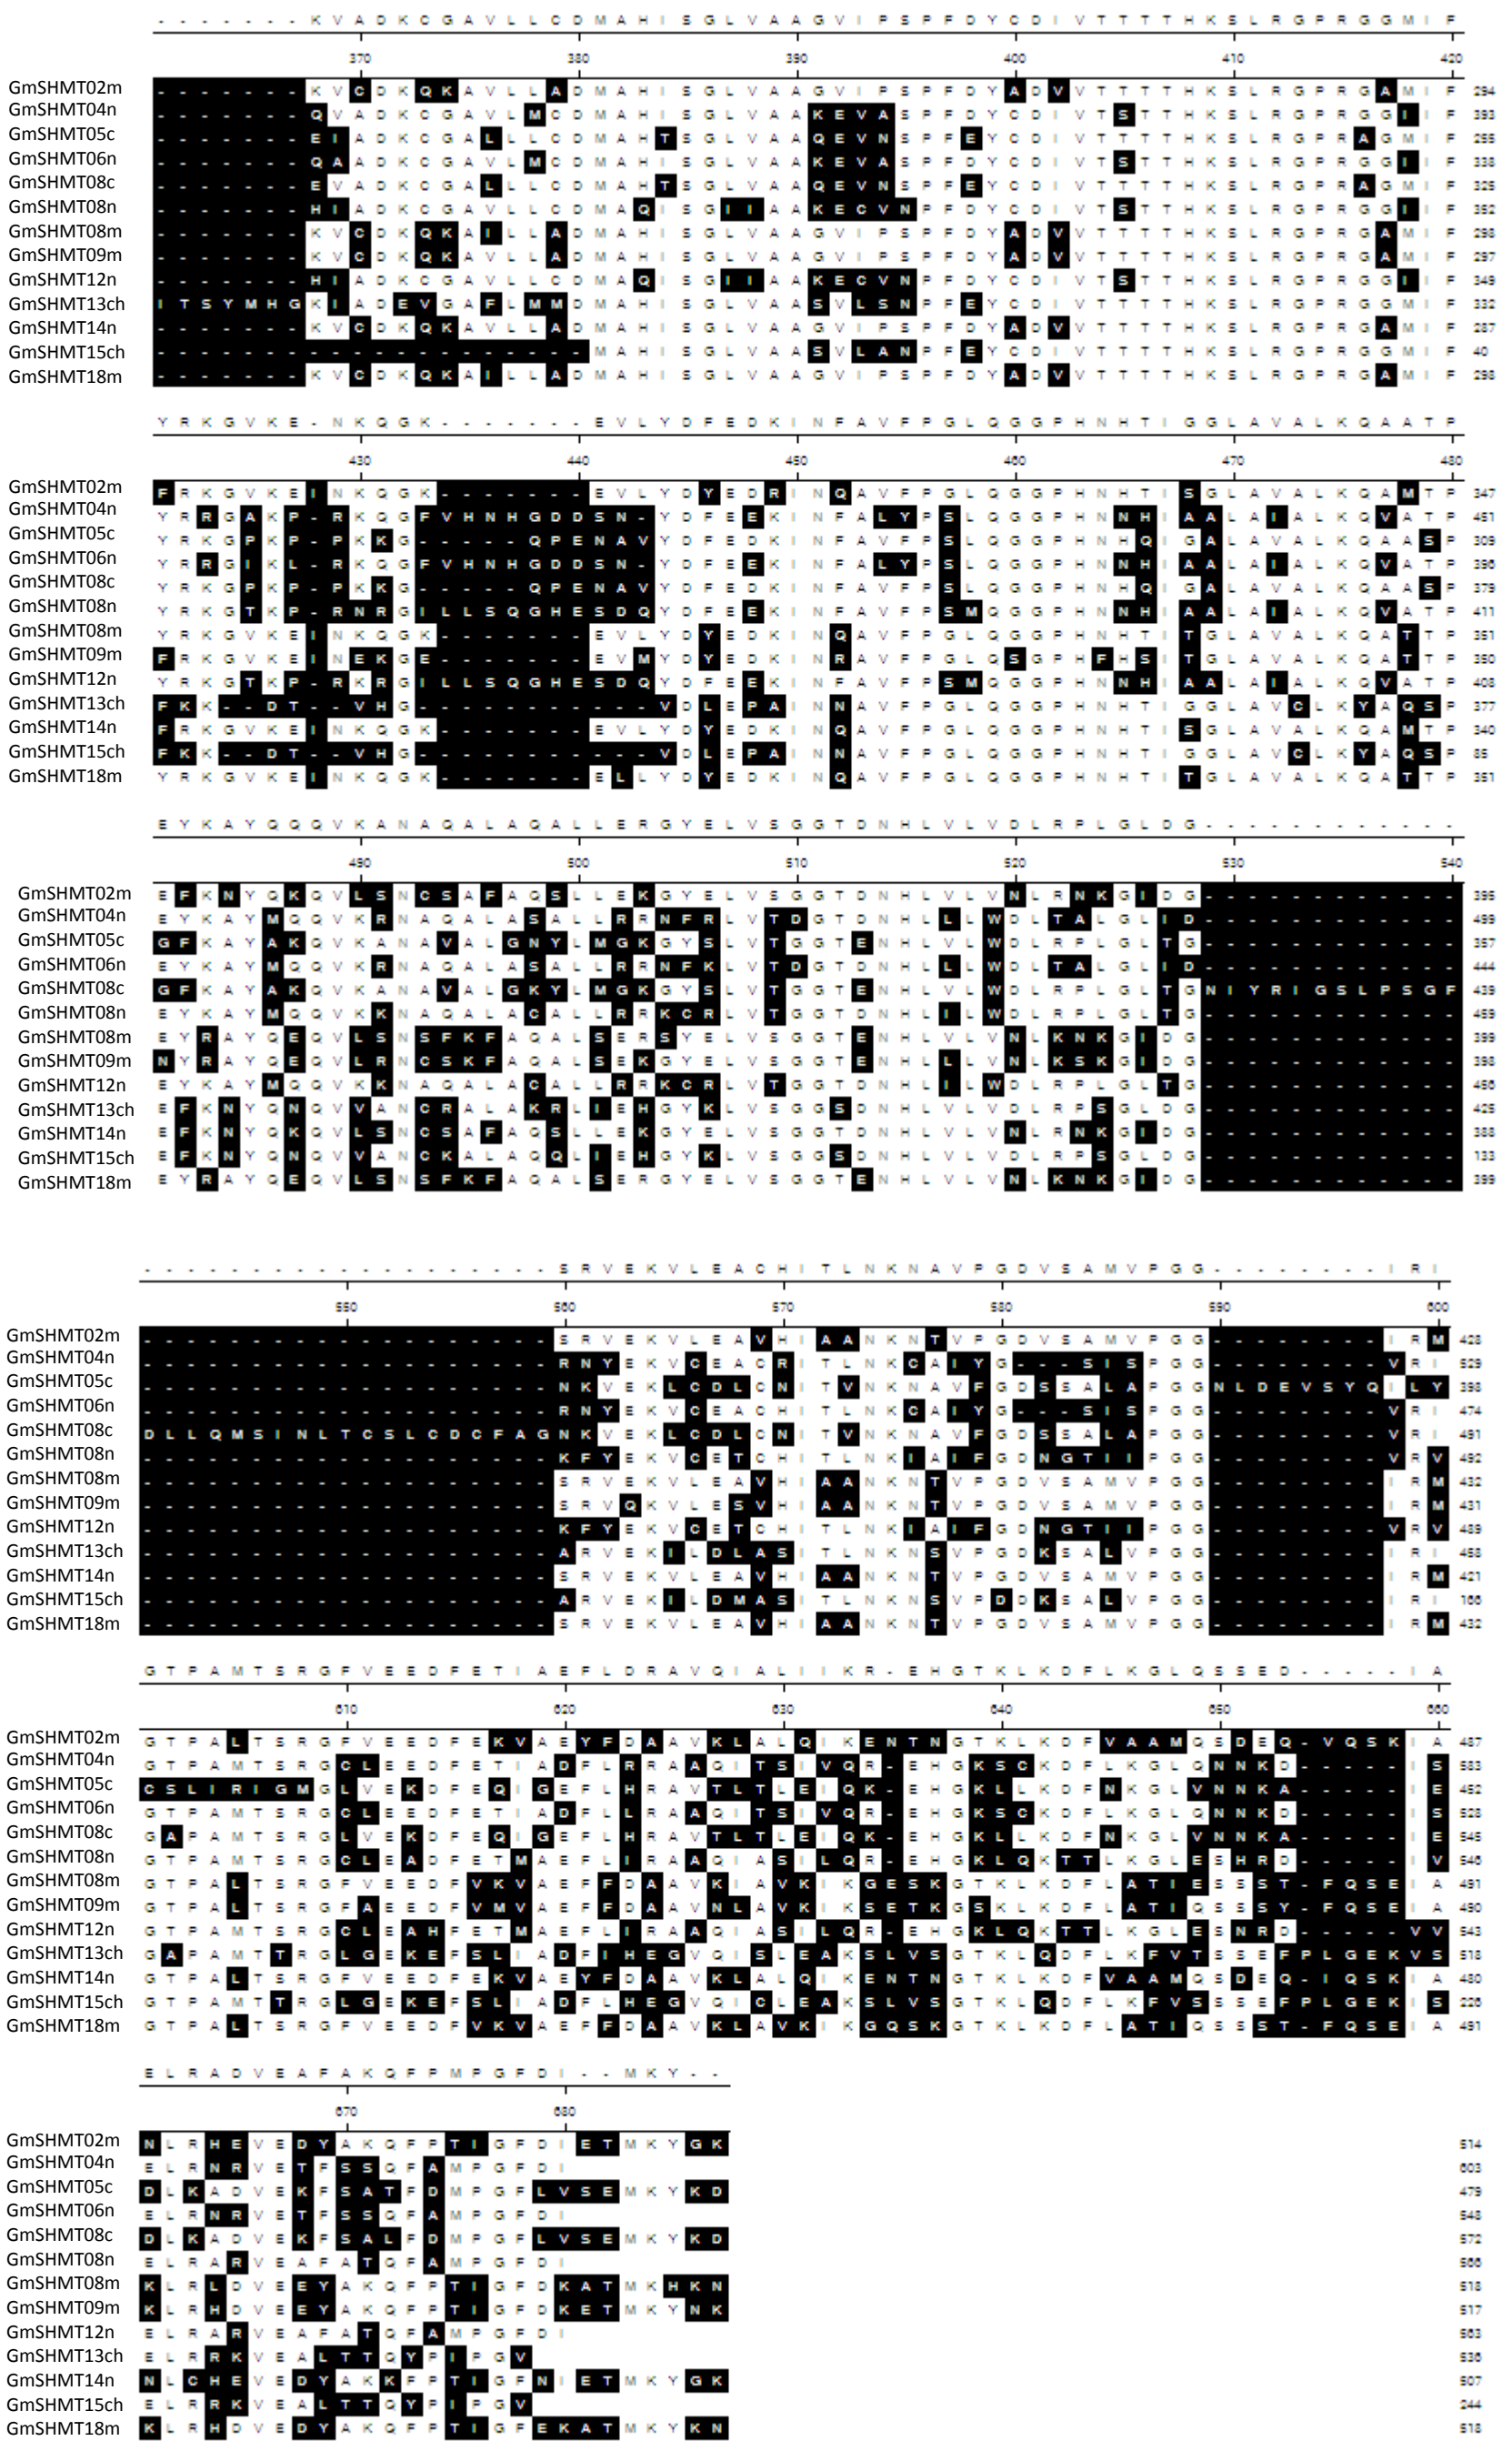

**Supplementary Figure S1. Comparative analysis of GmSHMT proteins in soybean.** Amino acid alignment for the predicted GmSHMT protein members in soybean. *In silico* analysis was performed using the MegAlign (DNASTAR Lasergene 8) software package and the Clustal W algorithm. All parameter values correspond to default definitions.

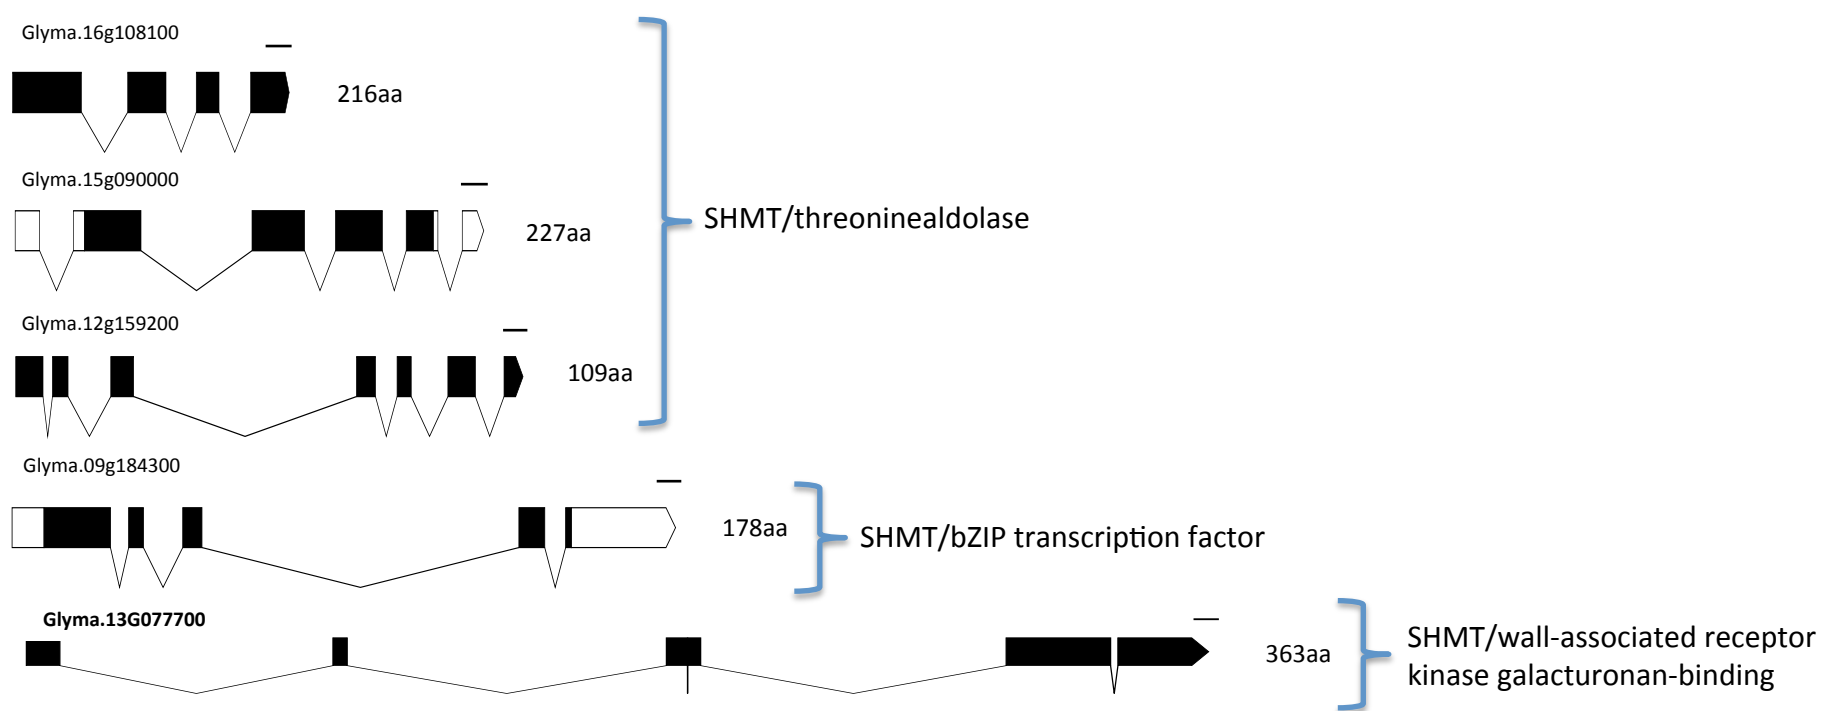

**Supplementary Figure S2. Bifunctional GmSHMT genomic DNA structure in soybean.** Black boxes represent exons, lines represent introns. White boxes represent 5' UTR and 3' UTR untranslated regions. Five GmSHMTs with multiple-bifunctional activities including a SHMT/Threoninealdolase, SHMT/Receptor Kinase, SHMT/transcription factor activity all encoding short proteins. It is presumed that they have diverged in their structure and function. Graphs were made using the Exon-Intron Graphic Maker Version 4, <http://wormweb.org/exonintron>. Scale represent 100 bp.

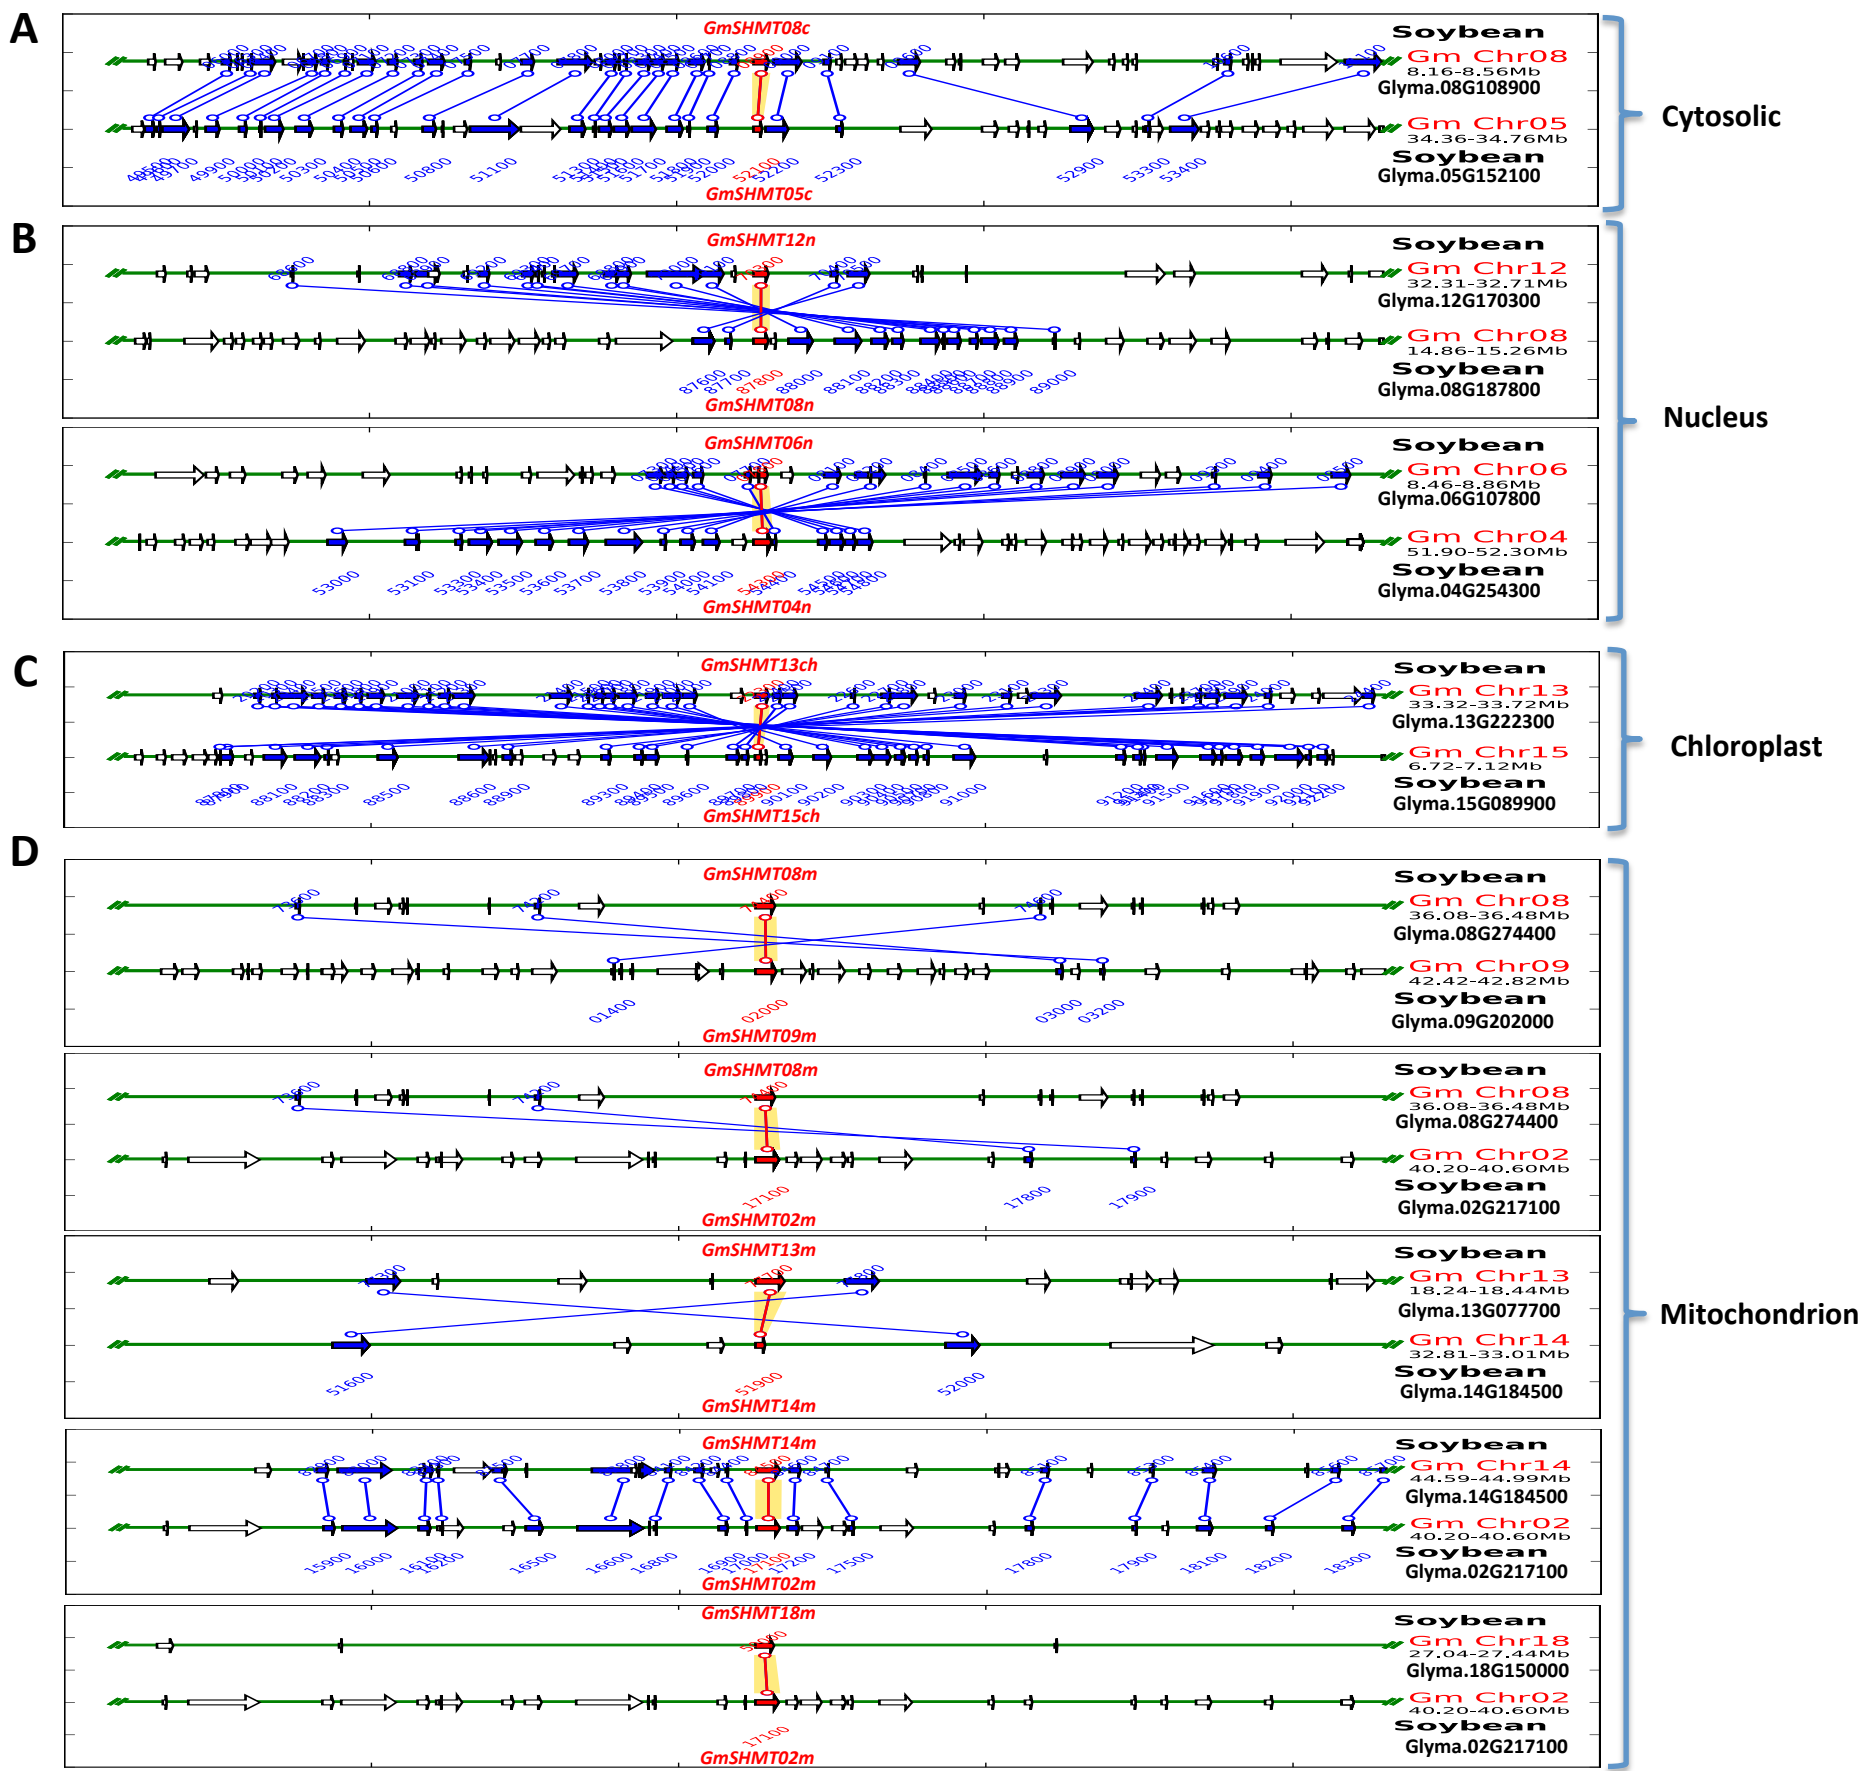

**Supplementary Figure S3. Schematic representation of *GmSHMT* containing duplicated segments identified in the soybean genome.** Soybean *SHMT* intragenome syntenic relationships were calculated using the Plant Genome Duplication Database. (A) Cytosolic *GmSHMTs* between chr08/chr05 belongs to a very large recent duplicated segment containing 551 additional conserved duplicated genes or anchors. (B) Nucleic *GmSHMTs* between chr12/chr08 and chr06/chr04 belong to another recent inverted duplicated segment containing 14 and 711 duplicated genes or anchors, respectively. (C) Chloroplastic *GmSHMTs* between chr13 and chr15 belongs to a fourth recent inverted duplicated segment containing 391 duplicated genes or anchors. (D) Mitochondrial *GmSHMTs* between chr08/chr09, chr08/chr02, and chr18/chr02 belongs to old duplicated segments containing 24, 10, and 7 duplicated genes or anchors. Graphs represent +/- 500 kb duplicated region centred in the *GmSHMT* genes.

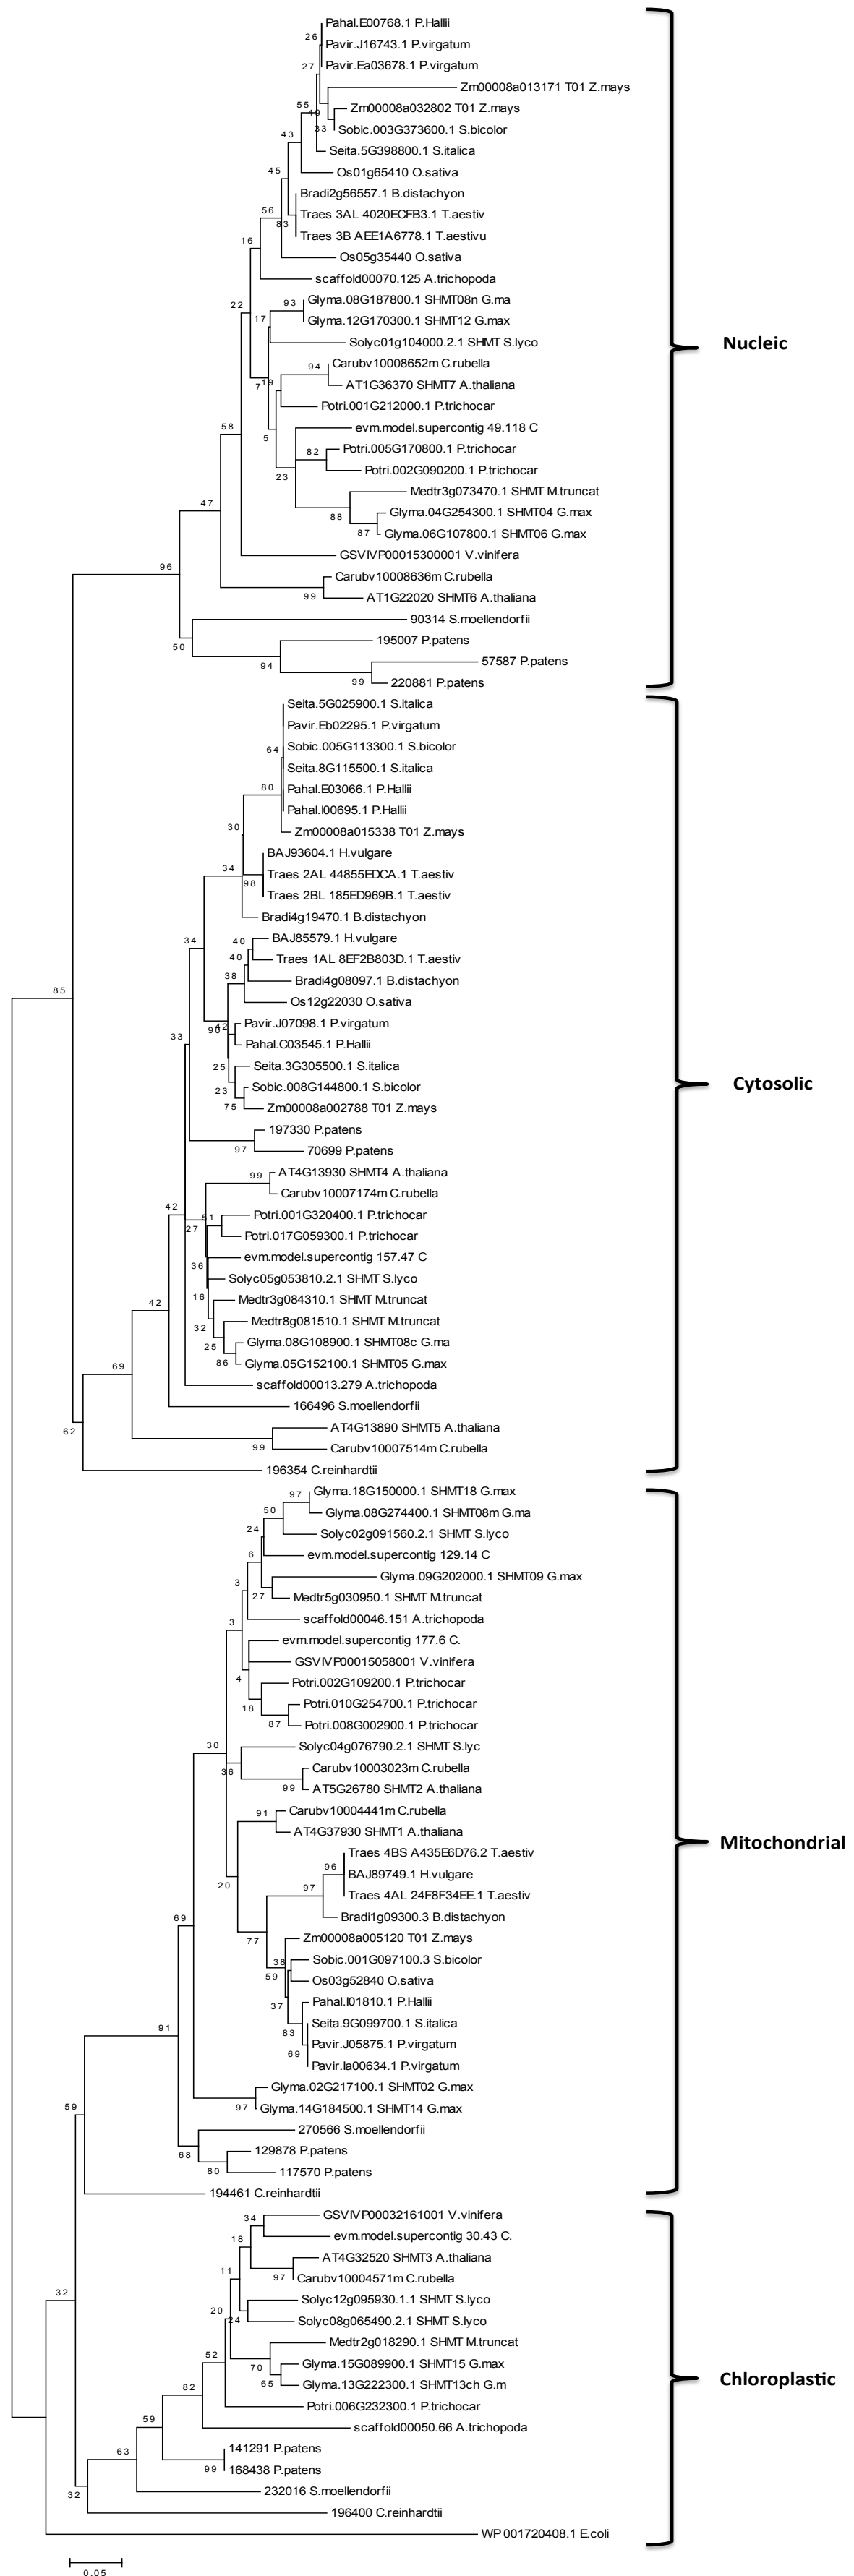

0.05

**Supplementary Figure S4. Phylogenetic tree of SHMT from 22 plants species showing absence of chloroplastic-targeted SHMTs in monocots.** All SHMT proteins identified in five model plants; *C. reinhardtii* (algae), *P. patens* (moss), *S. moellendorffii* (lycophyte), *O. sativa* (monocot), and *A. thaliana* (eudicot), in addition to *G. max* (soybean), in addition to other monocots and eudicots cytosolic, nucleic, chloroplastic, and mitochondrial-targeted SHMTs were included in the analysis. Extensive searches employing a considerable number of monocots including the plant model *O. sativa*, in addition to other monocots like *Z. mays*, *S. bicolor*, *S. italica*, *H. vulgare*, *P. hallii*, *P. virgatum*, and *T. aestivum* failed to identify any GmSHMT member within the chloroplastic clade. In addition, a remarkable decrease of chloroplastic-targeted GmSHMTs from all eudicots analysed was observed.

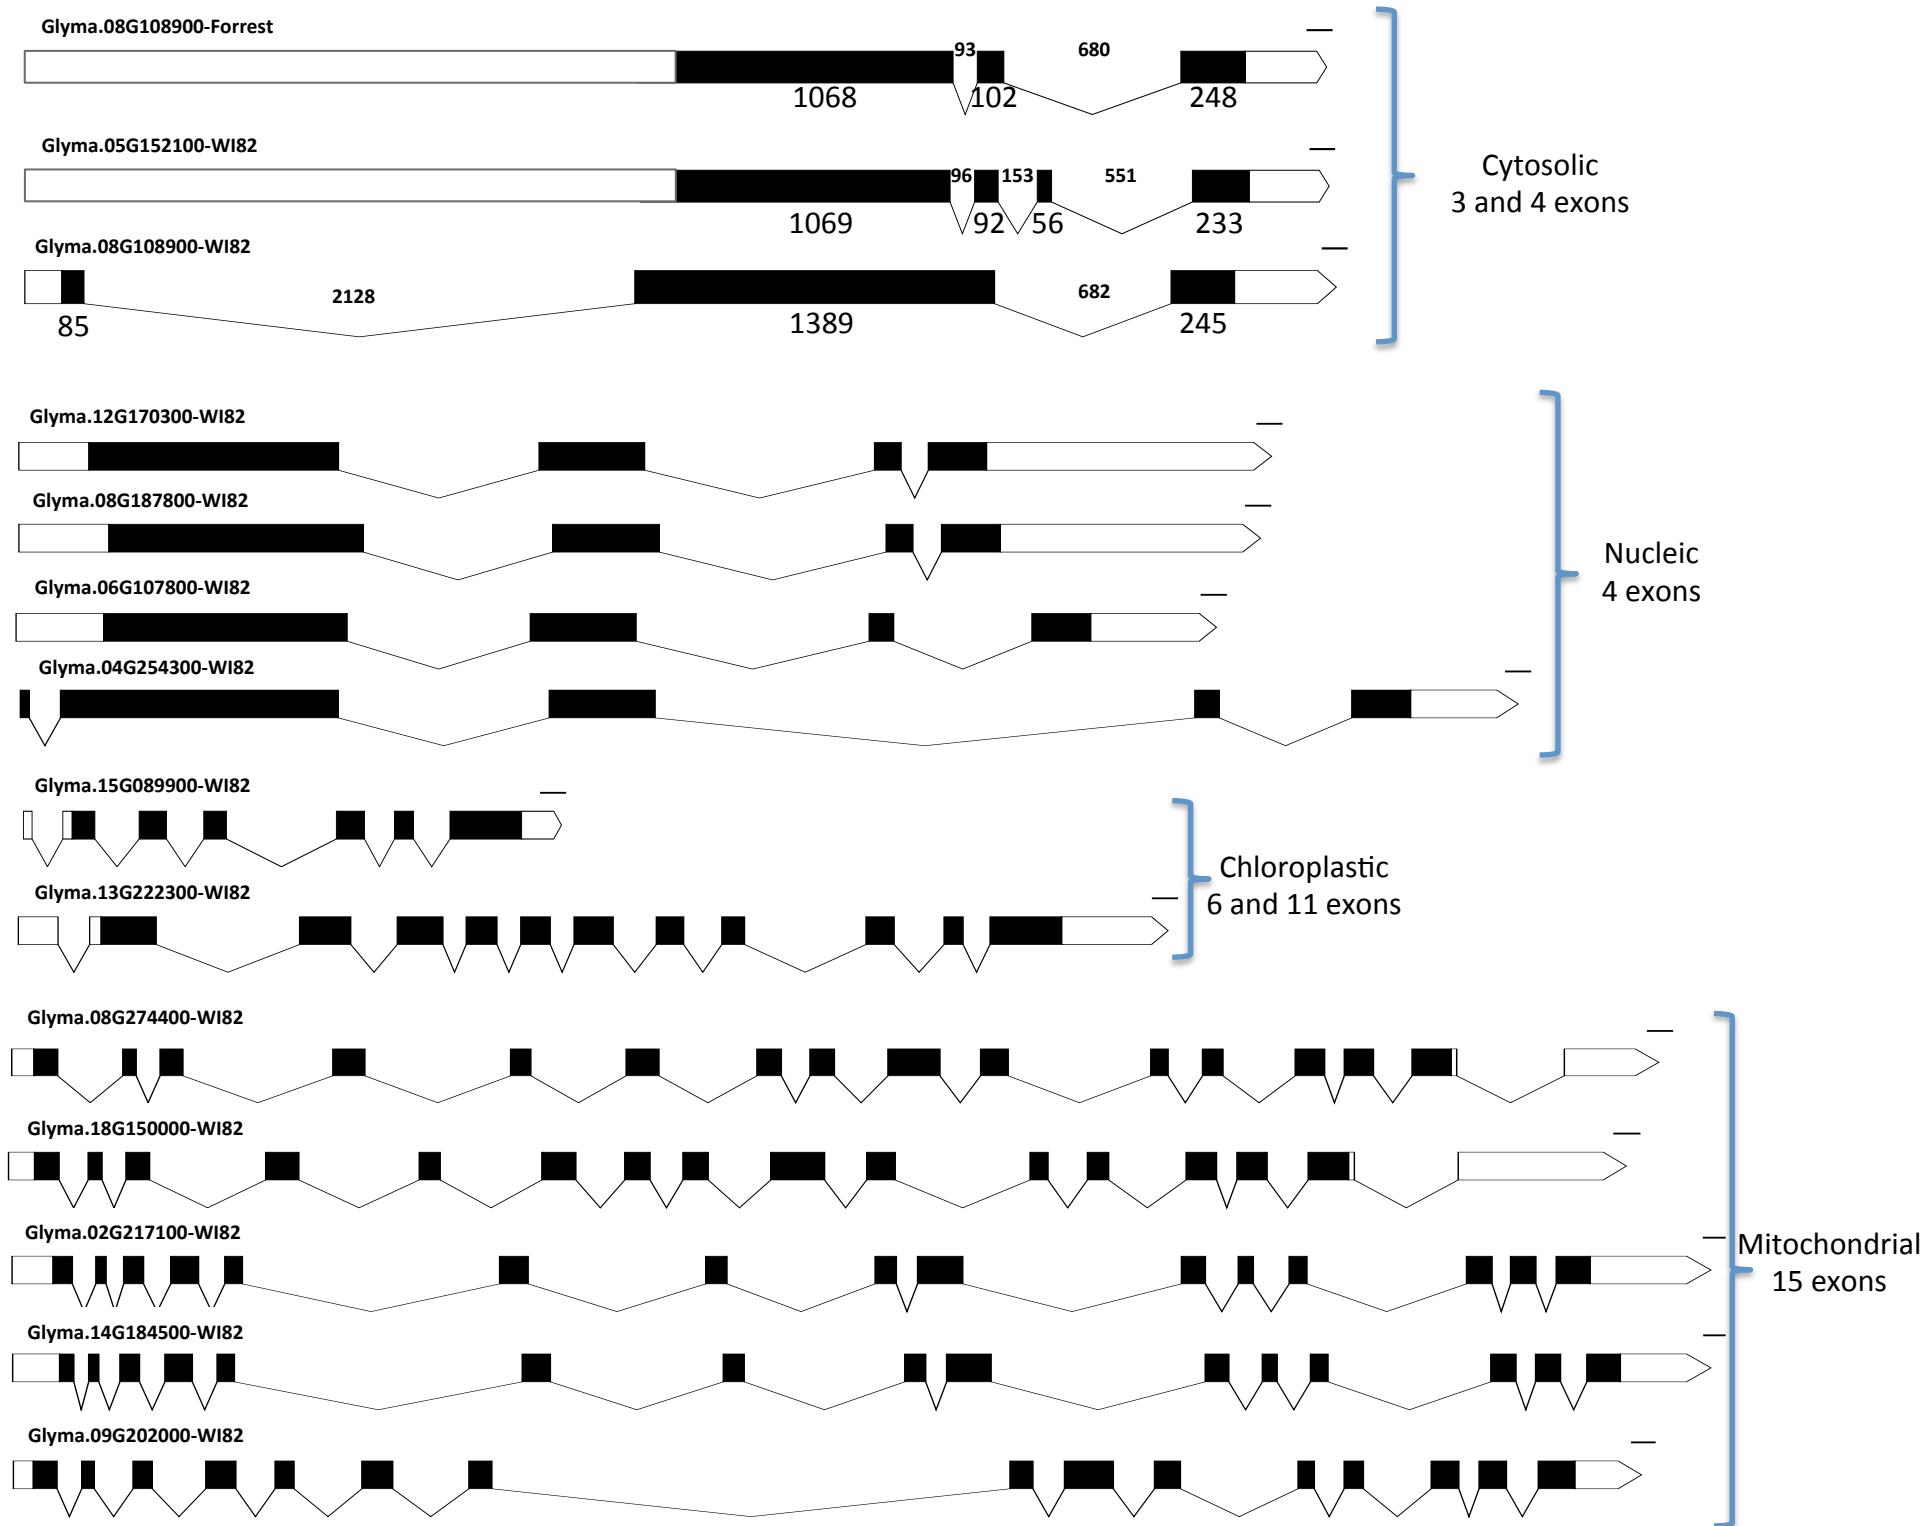

**Supplementary Figure S5. *GmSHMT* genomic DNA structure in soybean.** Black boxes represent exons, lines represent introns. White boxes represent 5' UTR and 3' UTR untranslated regions. Nucleic *GmSHMT*s has 4 Exons, mitochondrial *GmSHMT*s has 15 exons. Chloroplasmic *GmSHMT13* has 11 exons, however the truncated *GmSHMT15* contains 6 exons only. Cytosolic *GmSHMT*s present different numbers of exons, whereas the *GmSHMT05* represent 4 exons, the *GmSHMT08* contained 3 exons only. Graphs were made using the Exon-Intron Graphic Maker Version 4, <http://wormweb.org/exonintron>. Scale represent 100 bp.

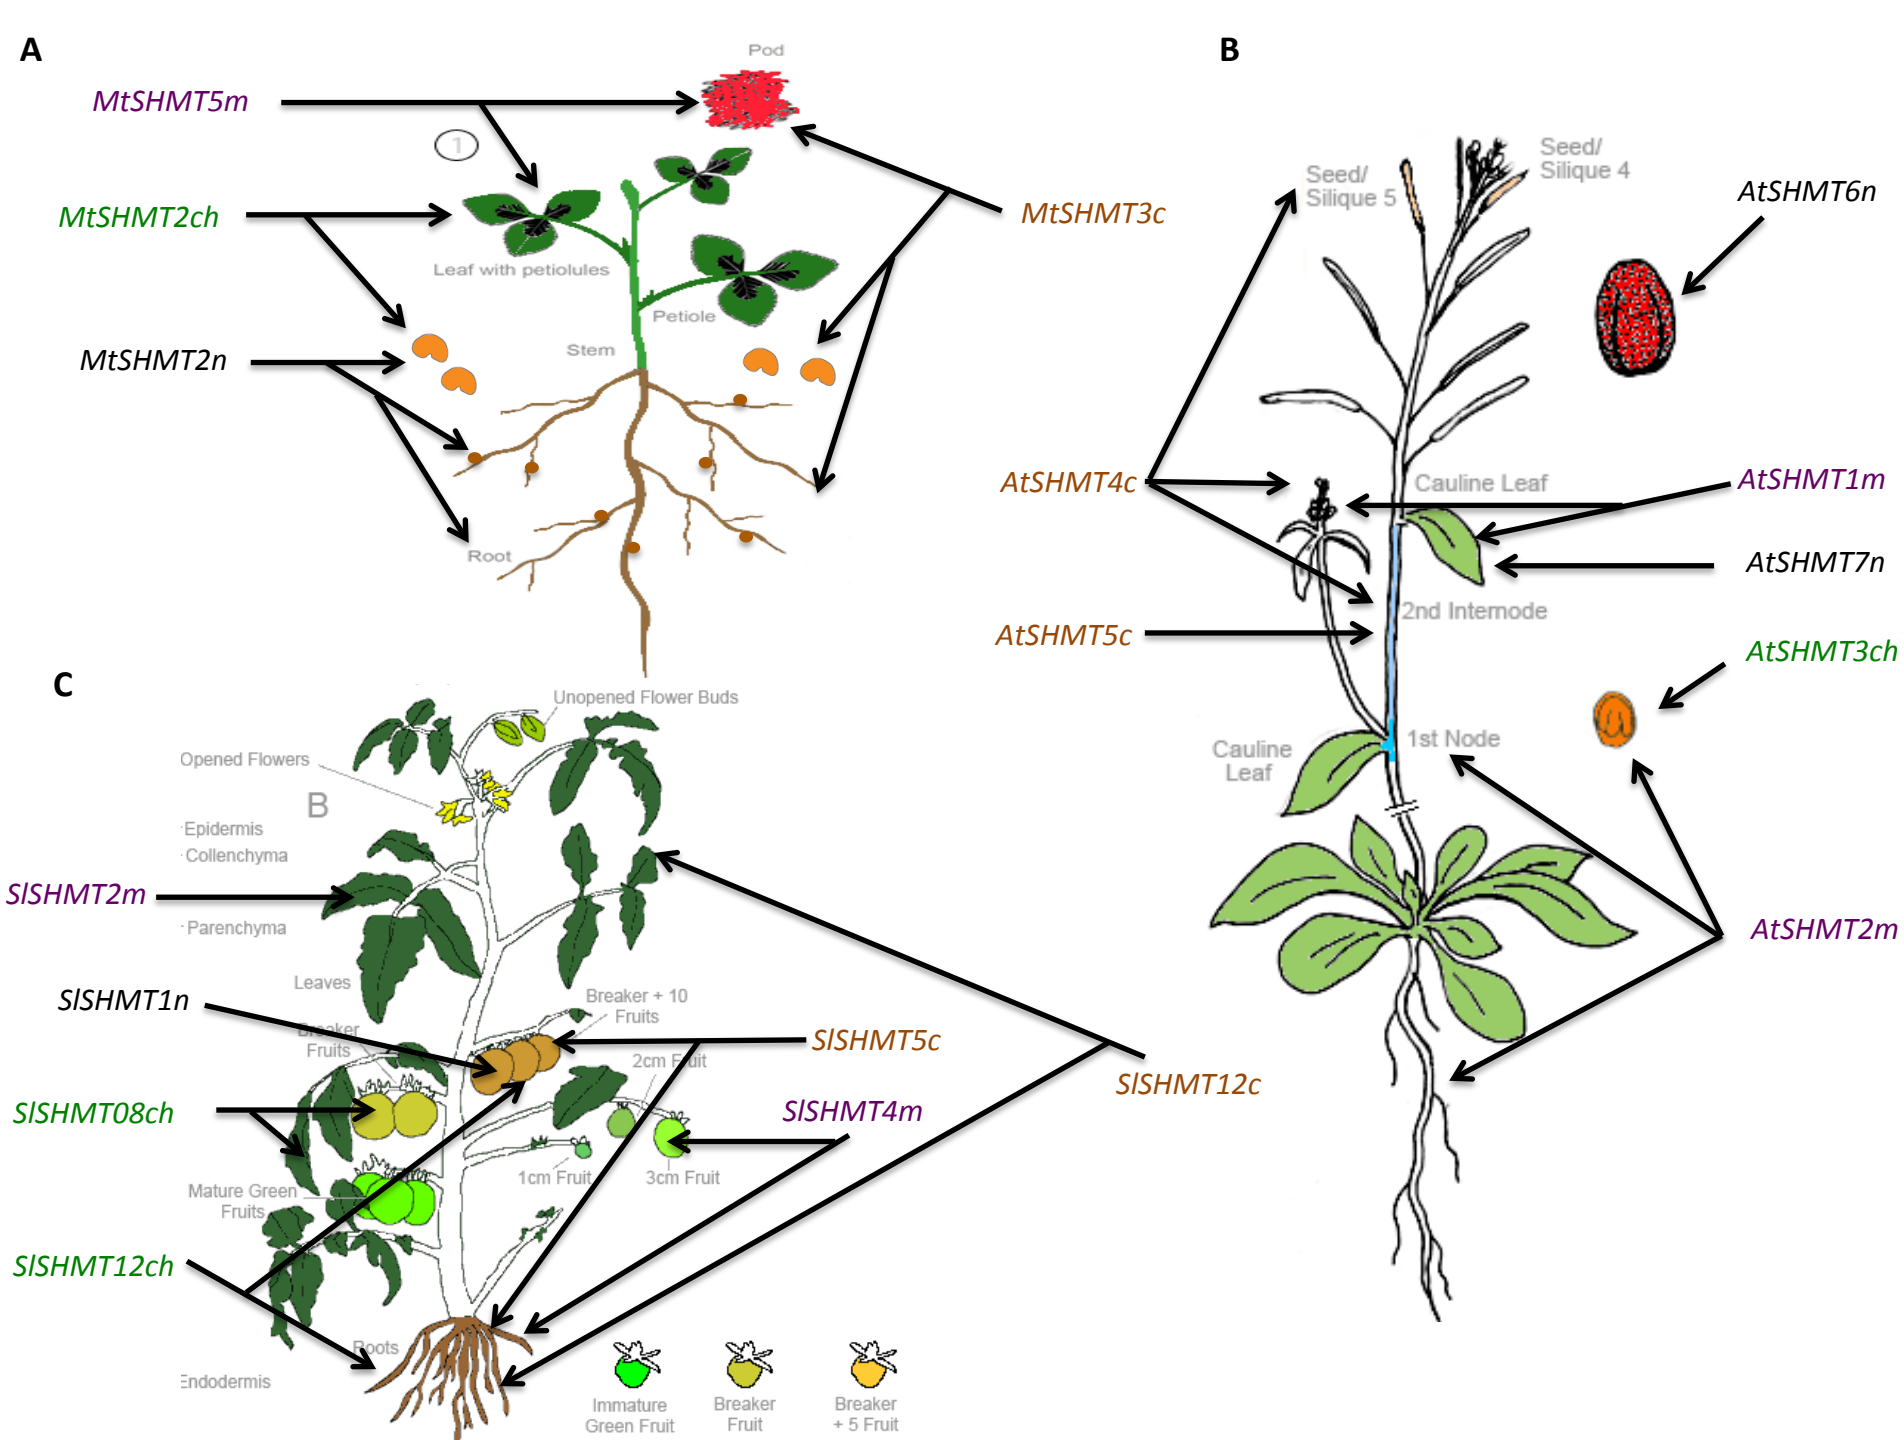

**Supplementary Figure S6.** Expression pattern of *Medicago truncatula* (A), *Arabidopsis thaliana* (B), and *Solanum lycopersicum* (C) SHMT gene members *in planta*, compiled from the public bio-analytic resource for plant biology database (<http://bar.utoronto.ca>) (Winter et al. 2007).



Glyma.05G152100.1

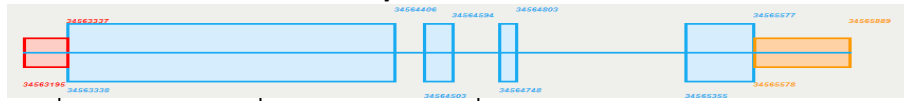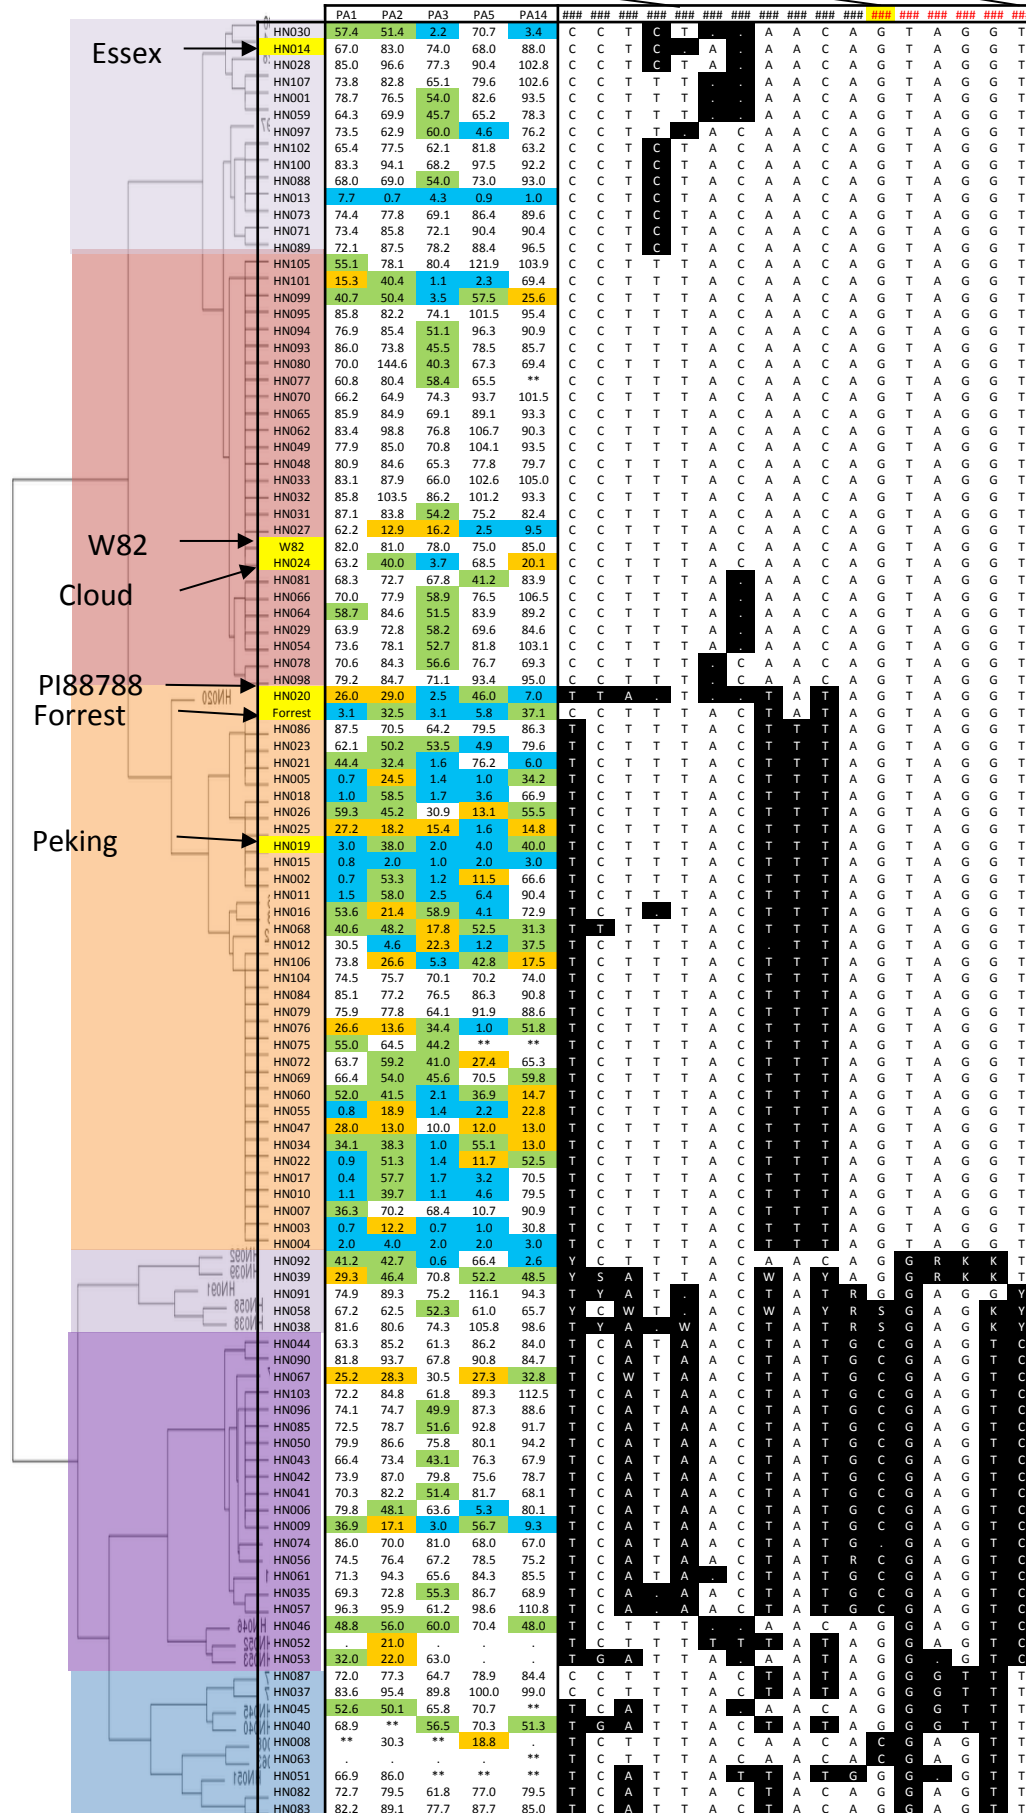

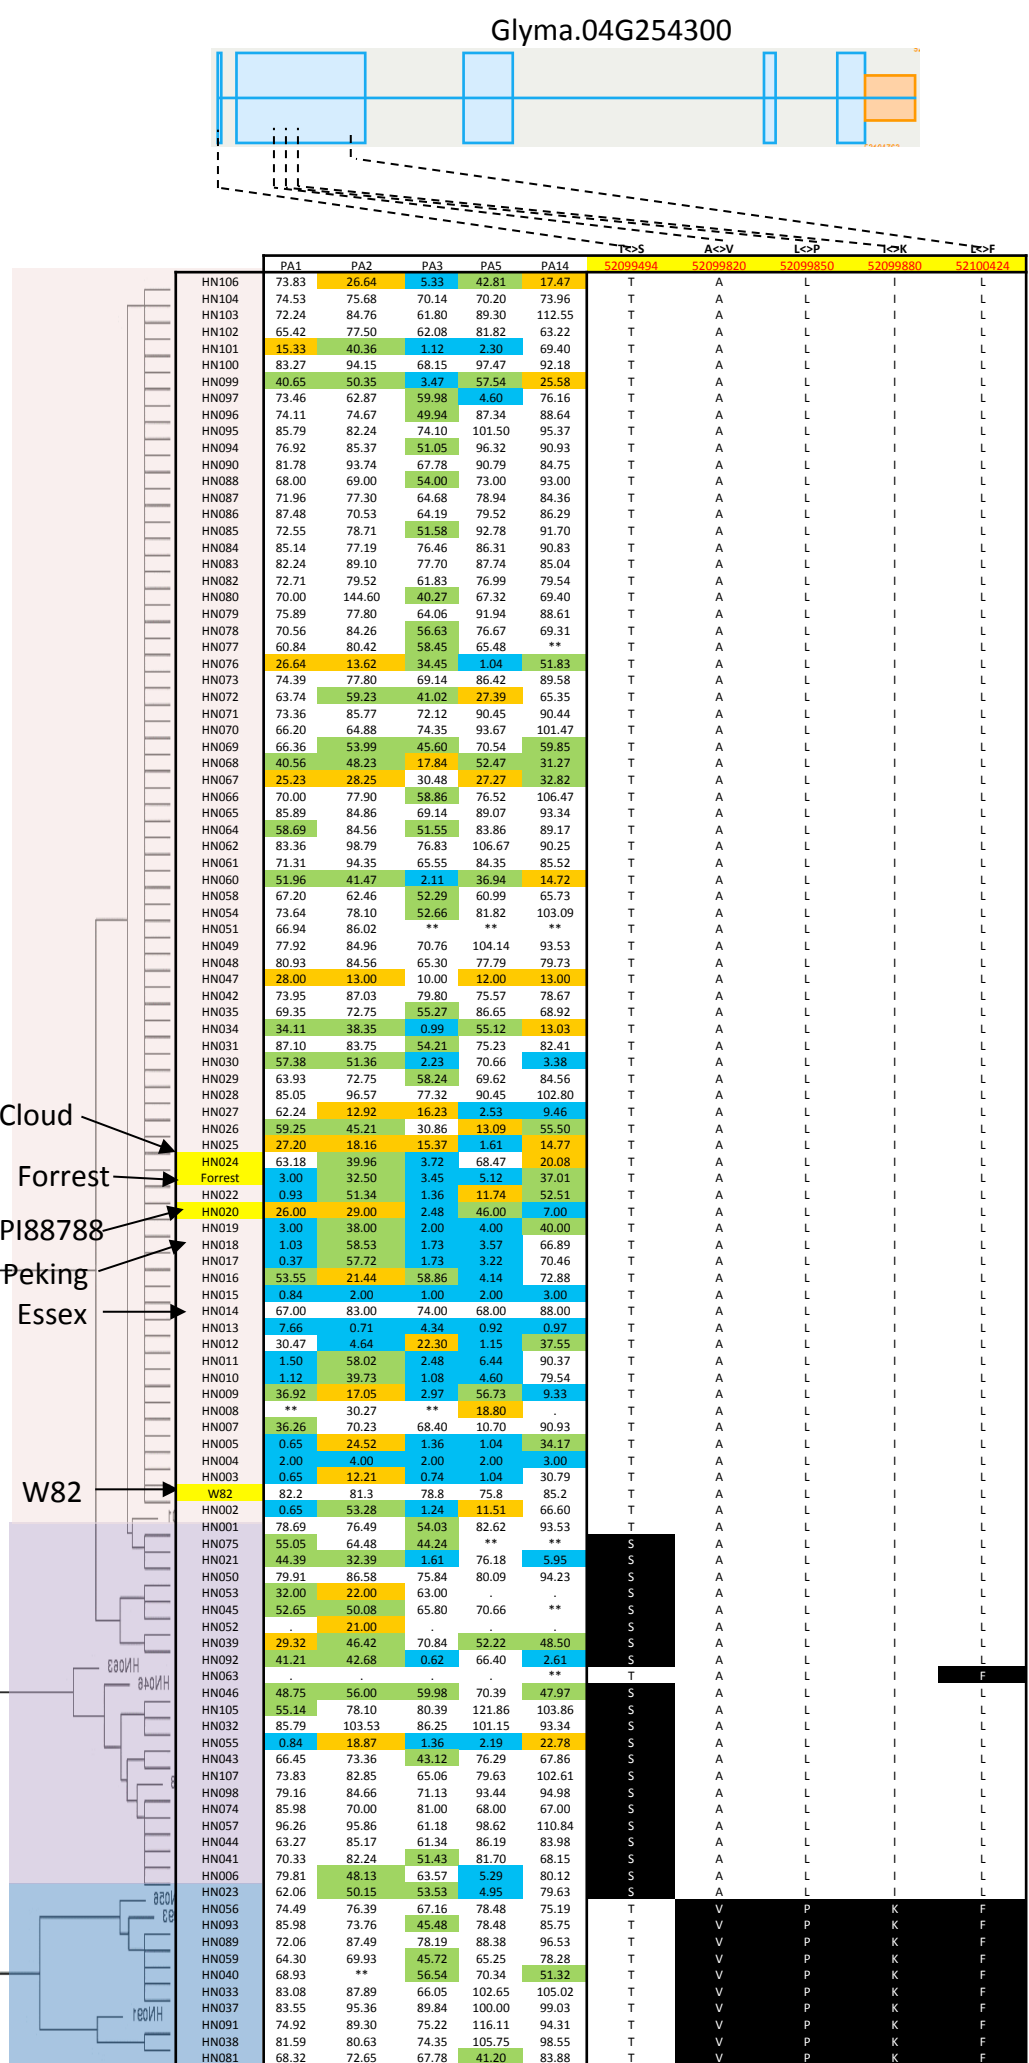

**Supplementary Figure S8. Haplotype clustering and correlation with soybean cyst nematode female index of the nucleic-localized *GmSHMT04n* in the 106 soybean lines.** The 106 soybean lines included non-domesticated; semi-domesticated, and elite domesticated introductions belonging to the USDA soybean collection. Schematic graphs shows the position of SNP/indel for *Glyma.04g254300* (*GmSHMT04n*) gene. SNP in black background were specific to Peking-type of resistance, and clustered with soybean lines carrying resistance to three SCN Hg-types; 0, 2.7, and 2.5.7. Blue box represents exon, blue bar represents intron, orange box represents promoter region, grey box represents 3' or 5' UTR. SNPs were positioned relative to the genomic position in W82. SNP position in red text showing non-synonymous SNPs leading to amino acid change. Female Index in blue (FI<10, resistant to SCN), in green (10<FI<30, Moderate resistance), in orange (30<FI<60, Moderate susceptibility), in white (60<FI, Susceptible to SCN).

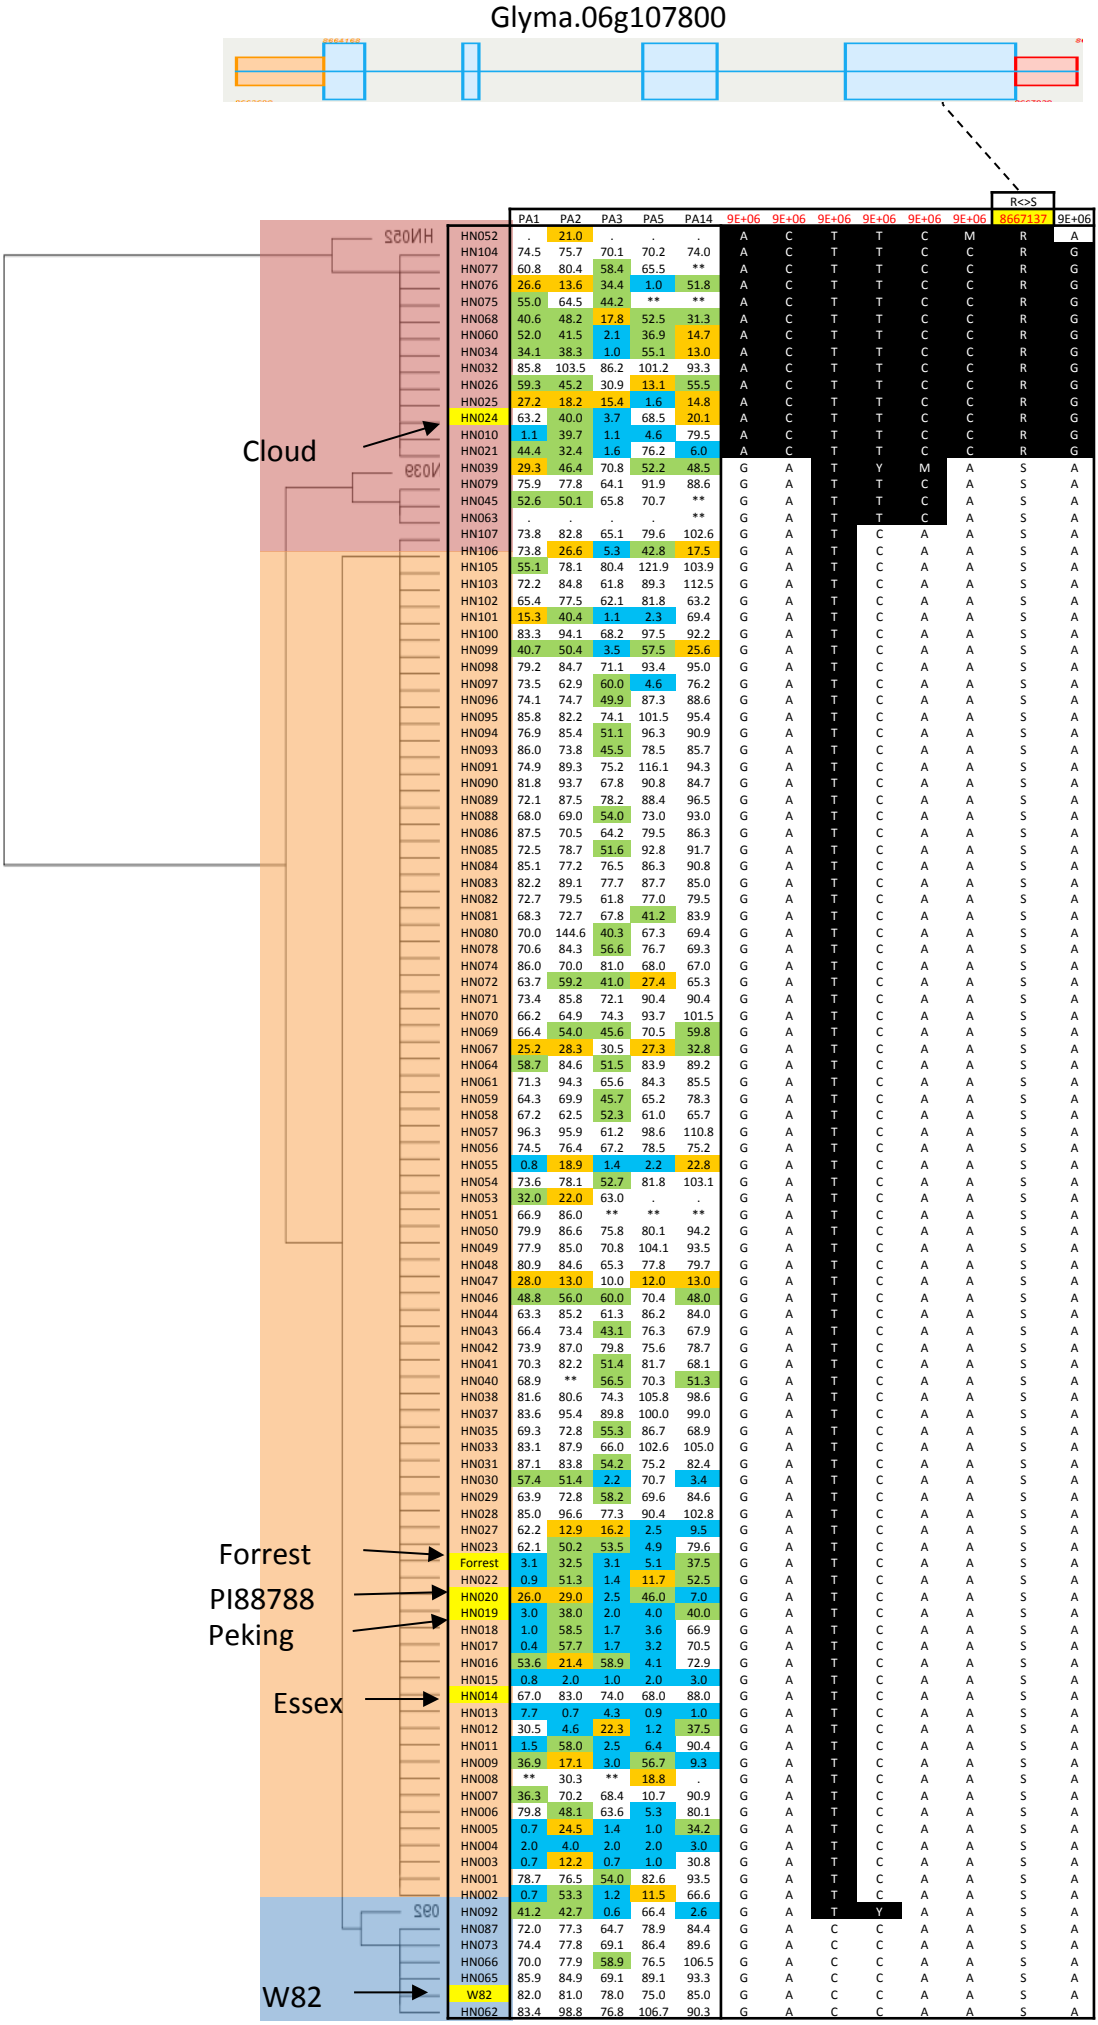

**Supplementary Figure S9. Haplotype clustering and correlation with soybean cyst nematode female index of the nucleic-localized *GmSHMT06n* in the 106 soybean lines.** The 106 soybean lines included non-domesticated; semi-domesticated, and elite domesticated introductions belonging to the USDA soybean collection. Schematic graphs shows the position of SNP/indel for *Glyma.06g107800* (*GmSHMT06n*) gene. SNP in black background were specific to Peking-type of resistance, and clustered with soybean lines carrying resistance to three SCN Hg-types; 0, 2.7, and 2.5.7. Blue box represents exon, blue bar represents intron, orange box represents promoter region, grey box represents 3' or 5' UTR. SNPs were positioned relative to the genomic position in W82. SNP position in red text showing non-synonymous SNPs leading to amino acid change. Female Index in blue (FI<10, resistant to SCN), in green (10<FI<30, Moderate resistance), in orange (30<FI<60, Moderate susceptibility), in white (60<FI, Susceptible to SCN).

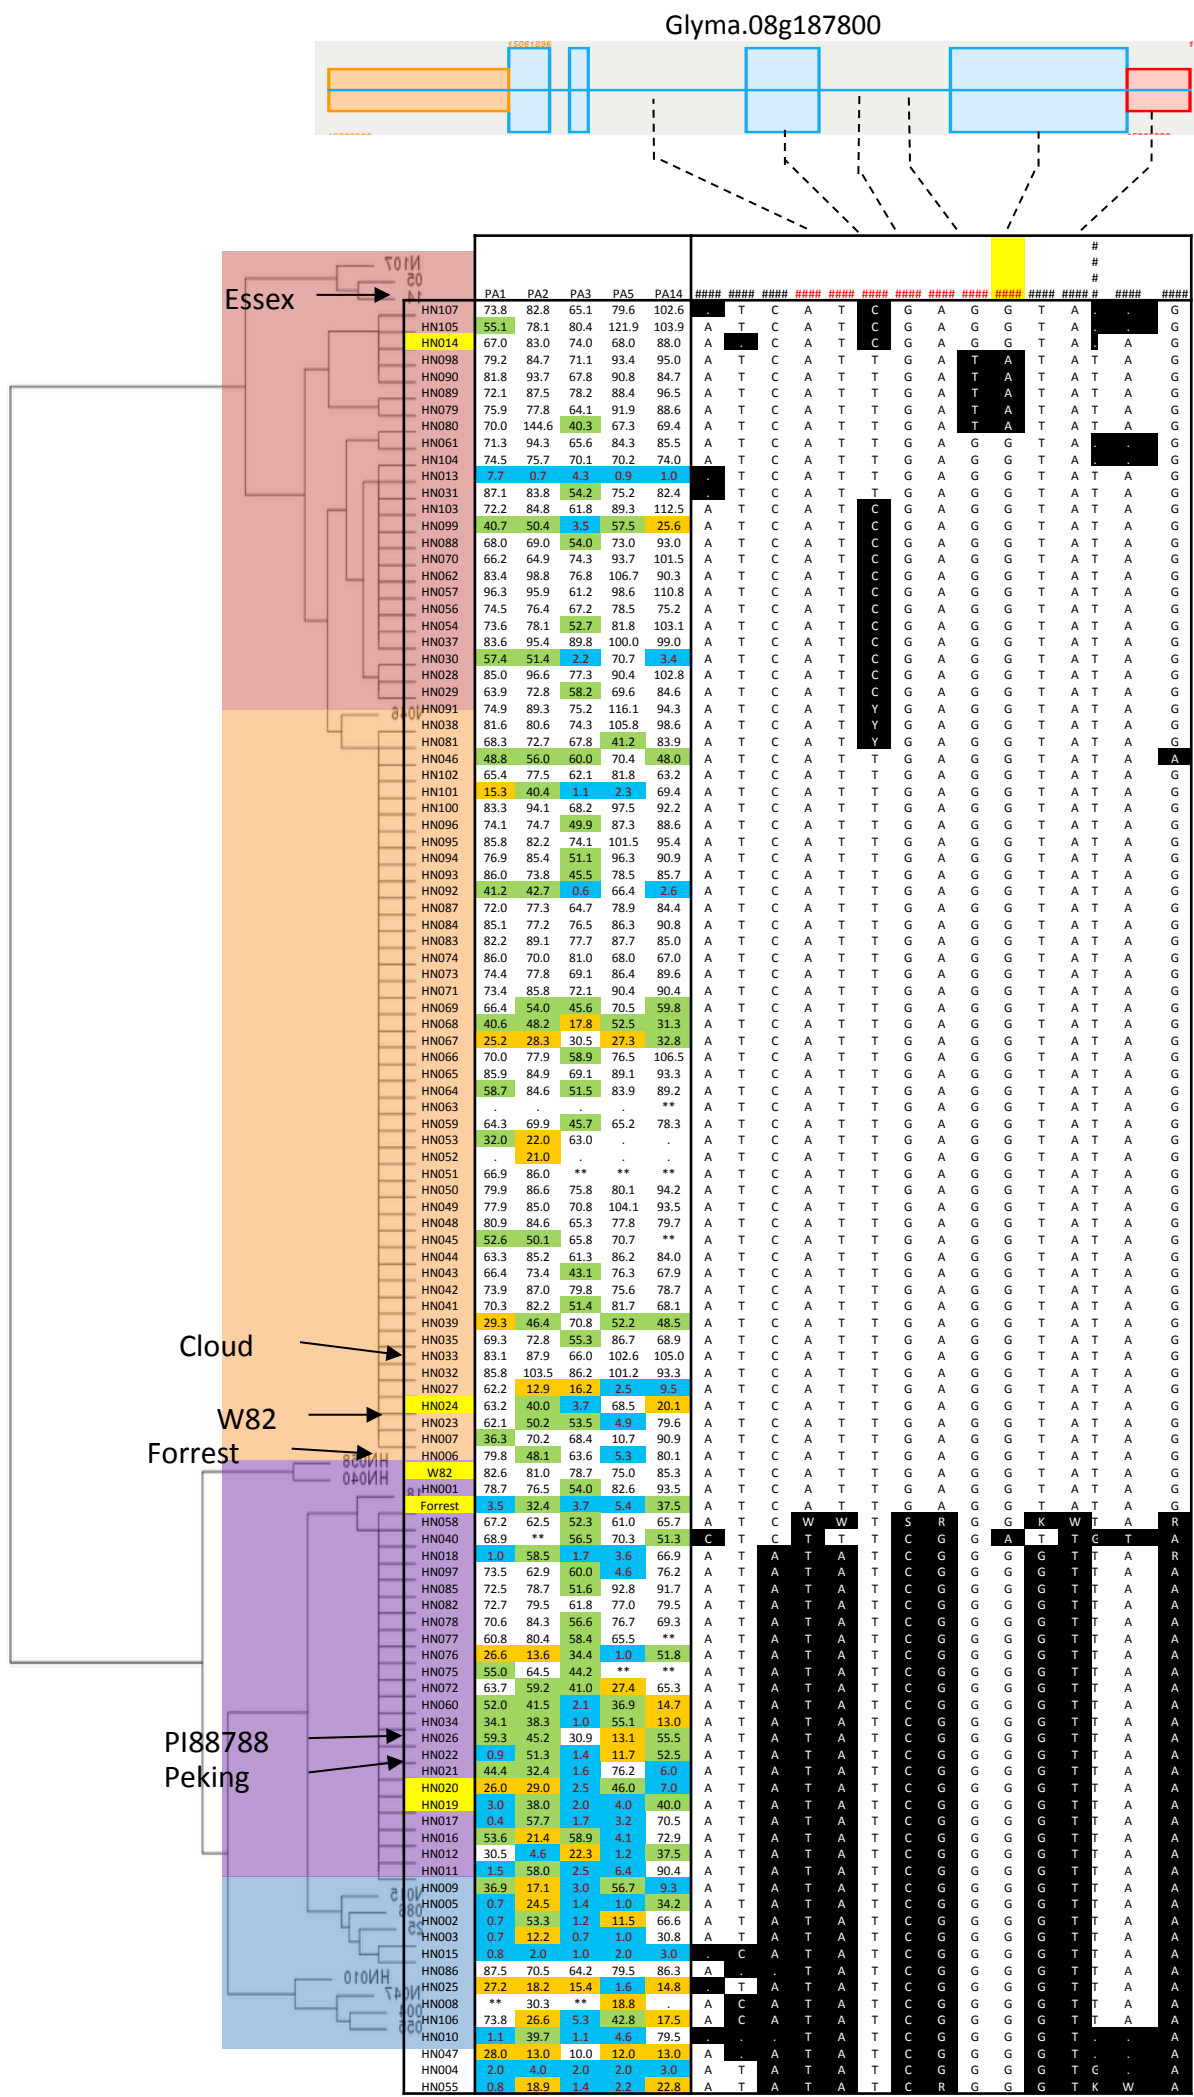



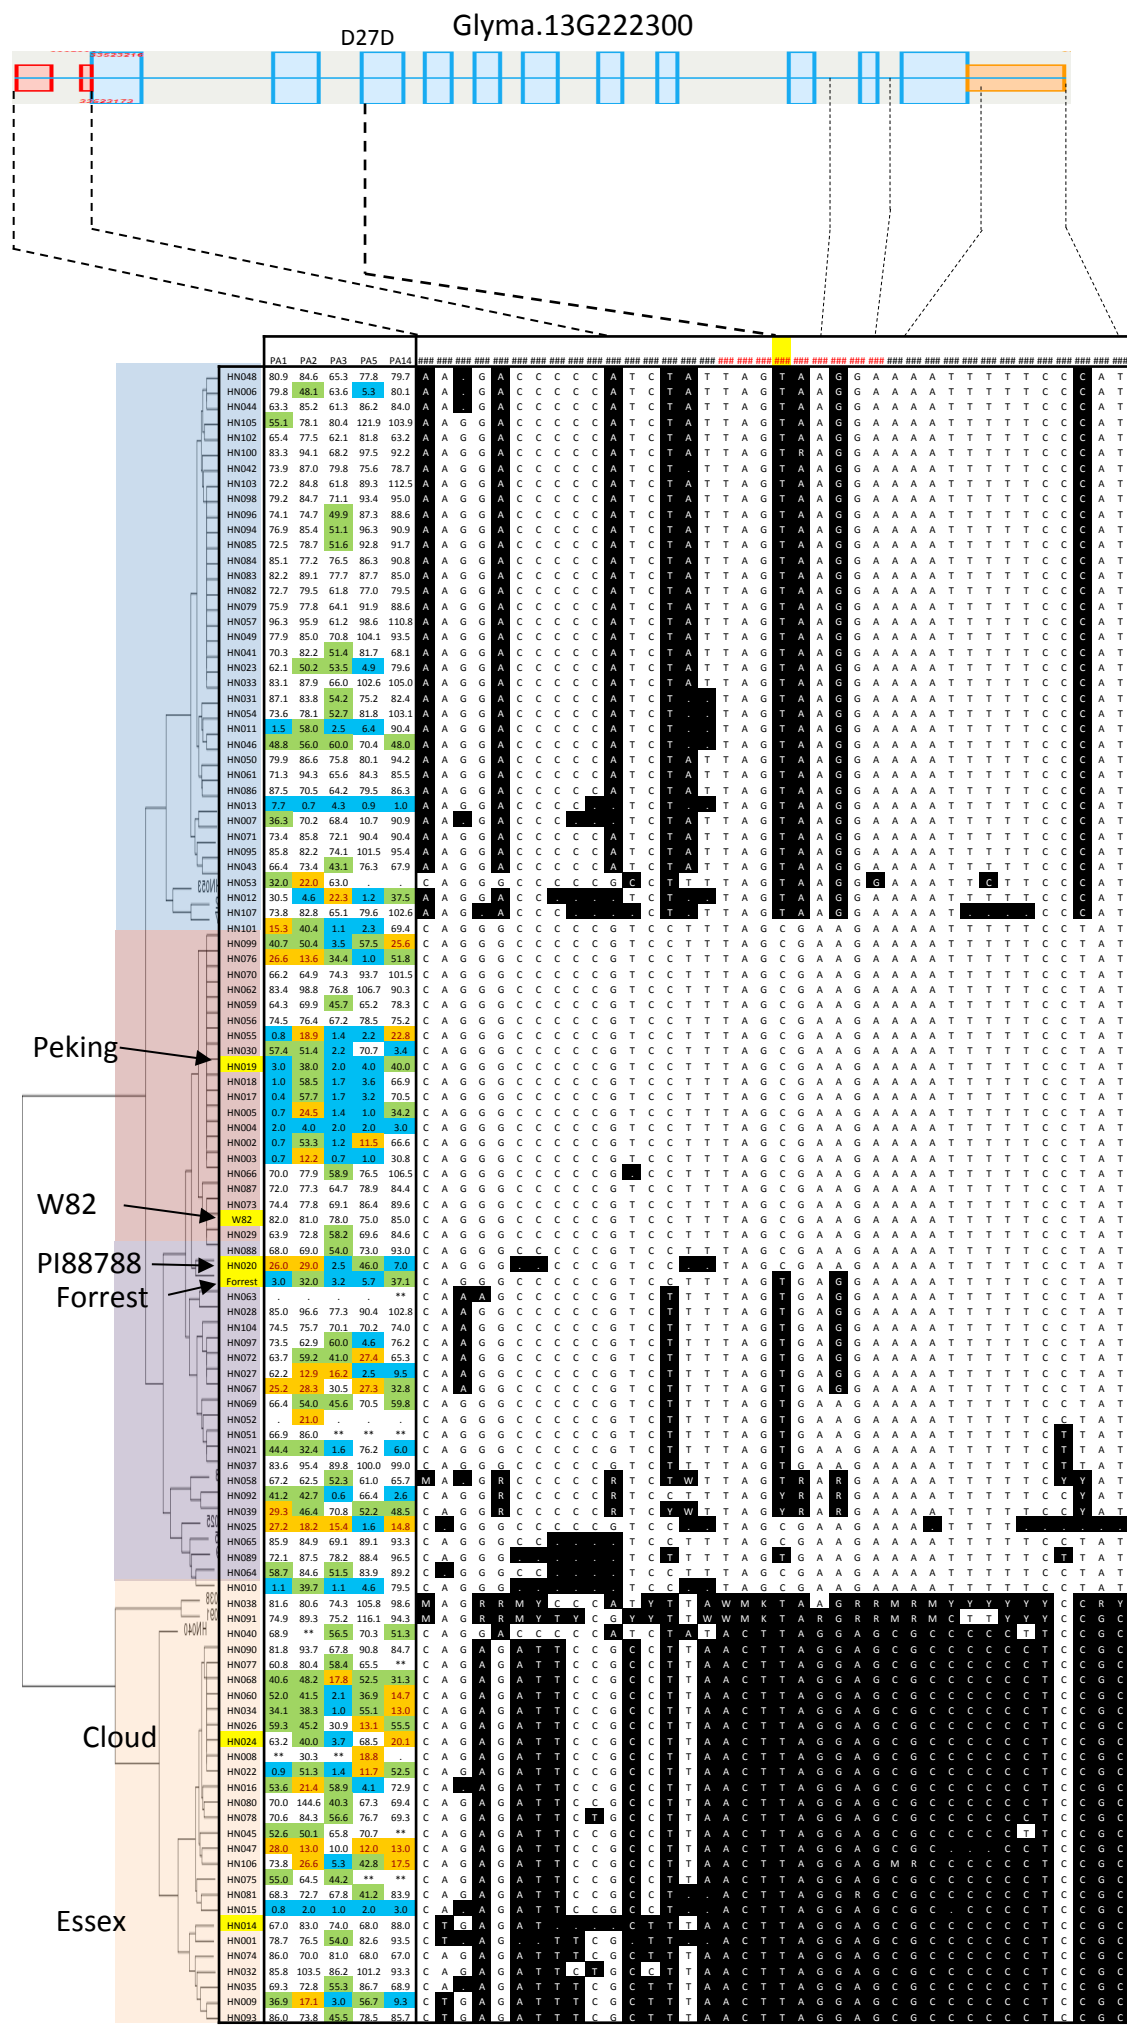

**Supplementary Figure S12. Haplotype clustering and correlation with soybean cyst nematode female index of the chloroplastic-localized *GmSHMT13ch* in the 106 soybean lines.** The 106 soybean lines included non-domesticated; semi-domesticated, and elite domesticated introductions belonging to the USDA soybean collection. Schematic graphs shows the position of SNP/indel for *Glyma.13g222300* (*GmSHMT13ch*) gene. SNP in black background were specific to Peking-type of resistance, and clustered with soybean lines carrying resistance to three SCN Hg-types; 0, 2.7, and 2.5.7. Blue box represents exon, blue bar represents intron, orange box represents promoter region, grey box represents 3' or 5' UTR. SNPs were positioned relative to the genomic position in W82. SNP position in red text showing non-synonymous SNPs leading to amino acid change. Female Index in blue (FI<10, resistant to SCN), in green (10<FI<30, Moderate resistance), in orange (30<FI<60, Moderate susceptibility), in white (60<FI, Susceptible to SCN).

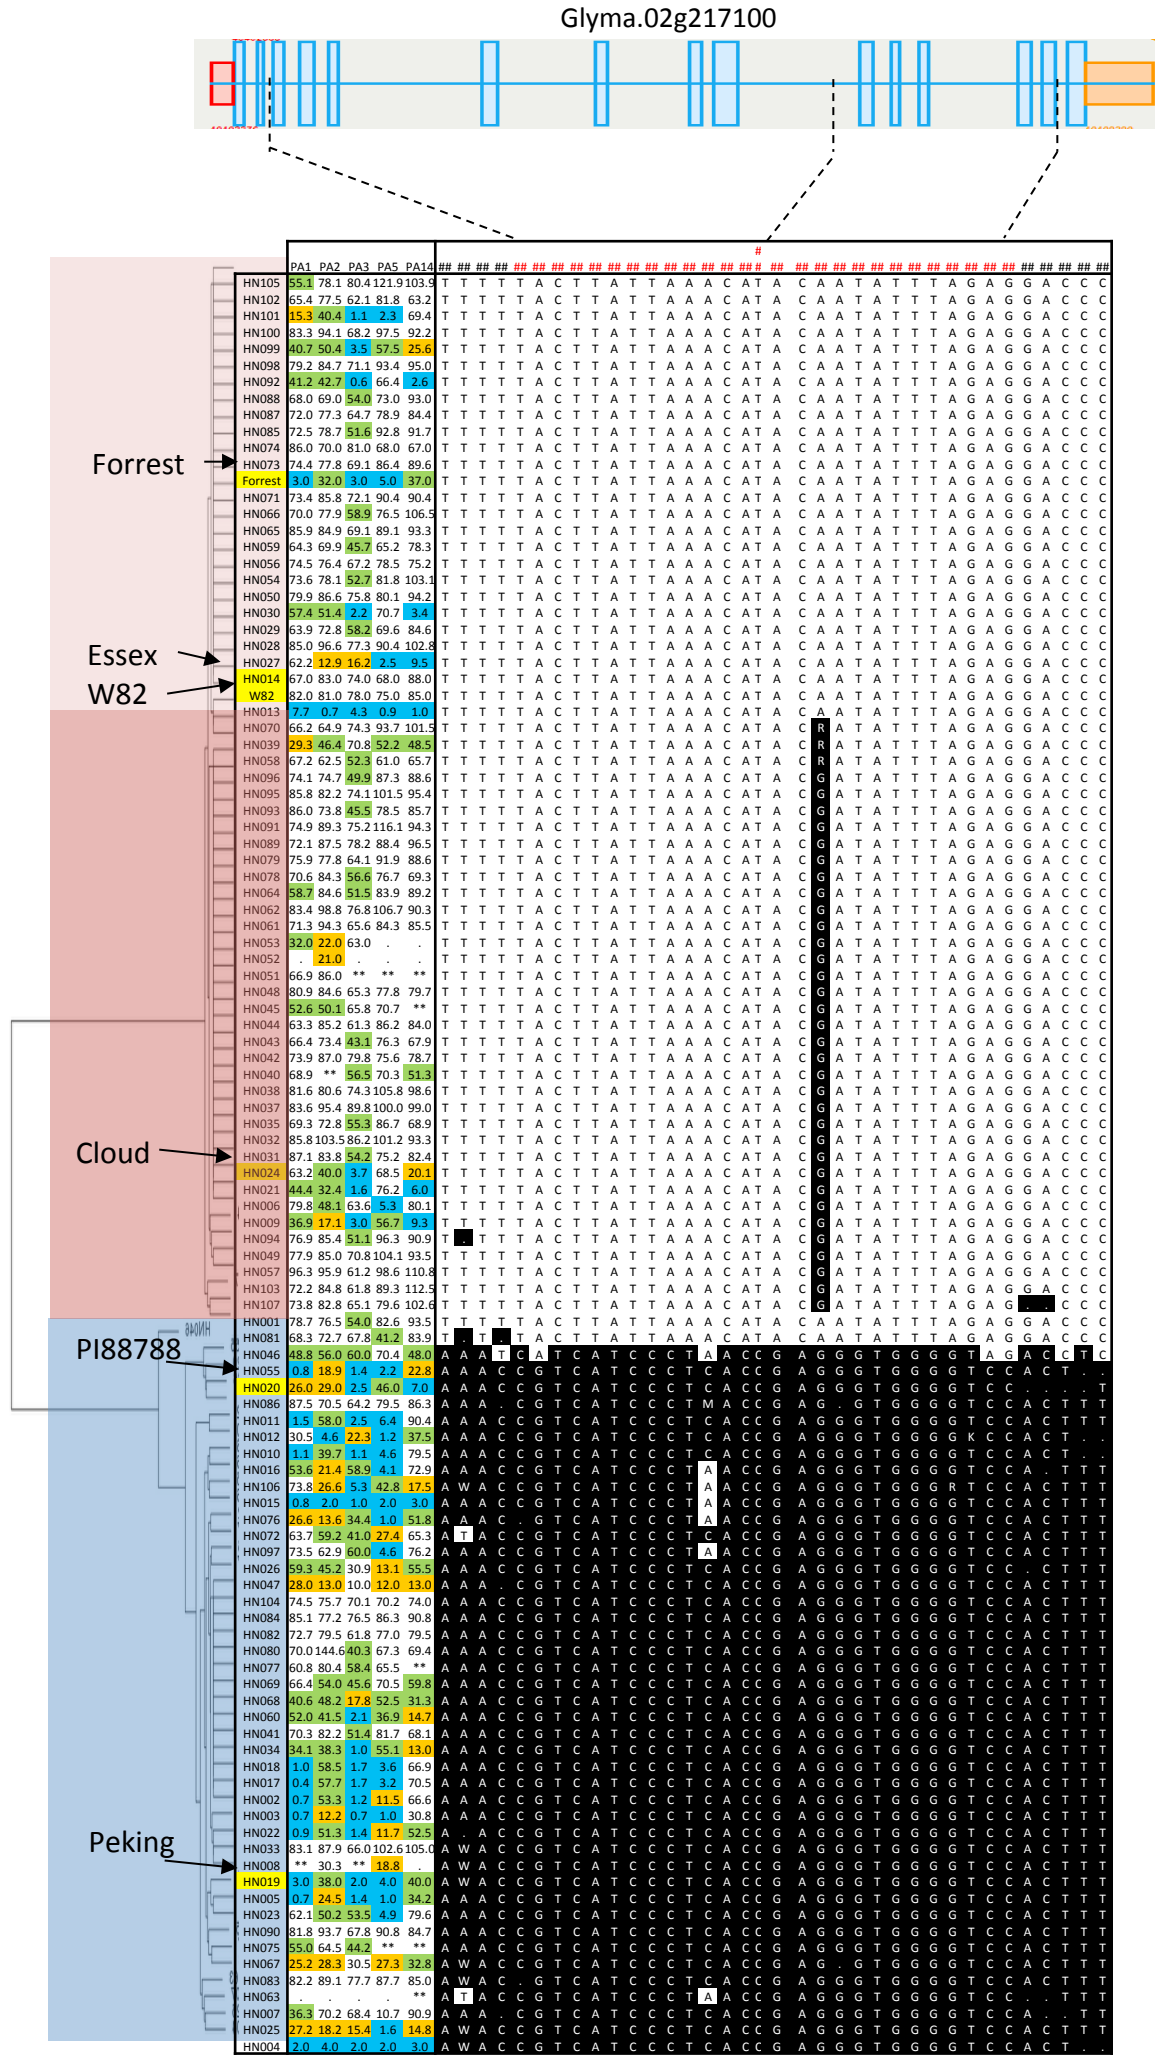

**Supplementary Figure S13. Haplotype clustering and correlation with soybean cyst nematode female index of the mitochondrial-localized *GmSHMT02m* in the 106 soybean lines.** The 106 soybean lines included non-domesticated, semi-domesticated, and elite domesticated introductions belonging to the USDA soybean collection. Schematic graphs shows the position of SNP/indel for *Glyma.02g217100* (*GmSHMT02m*) gene. SNP in black background were specific to Peking-type of resistance, and clustered with soybean lines carrying resistance to three SCN Hg-types; 0, 2.7, and 2.5.7. Blue box represents exon, blue bar represents intron, orange box represents promoter region, grey box represents 3' or 5' UTR. SNPs were positioned relative to the genomic position in W82. SNP position in red text showing non-synonymous SNPs leading to amino acid change. Female Index in blue (FI<10, resistant to SCN), in green (10<FI<30, Moderate resistance), in orange (30<FI<60, Moderate susceptibility), in white (60<FI, Susceptible to SCN).

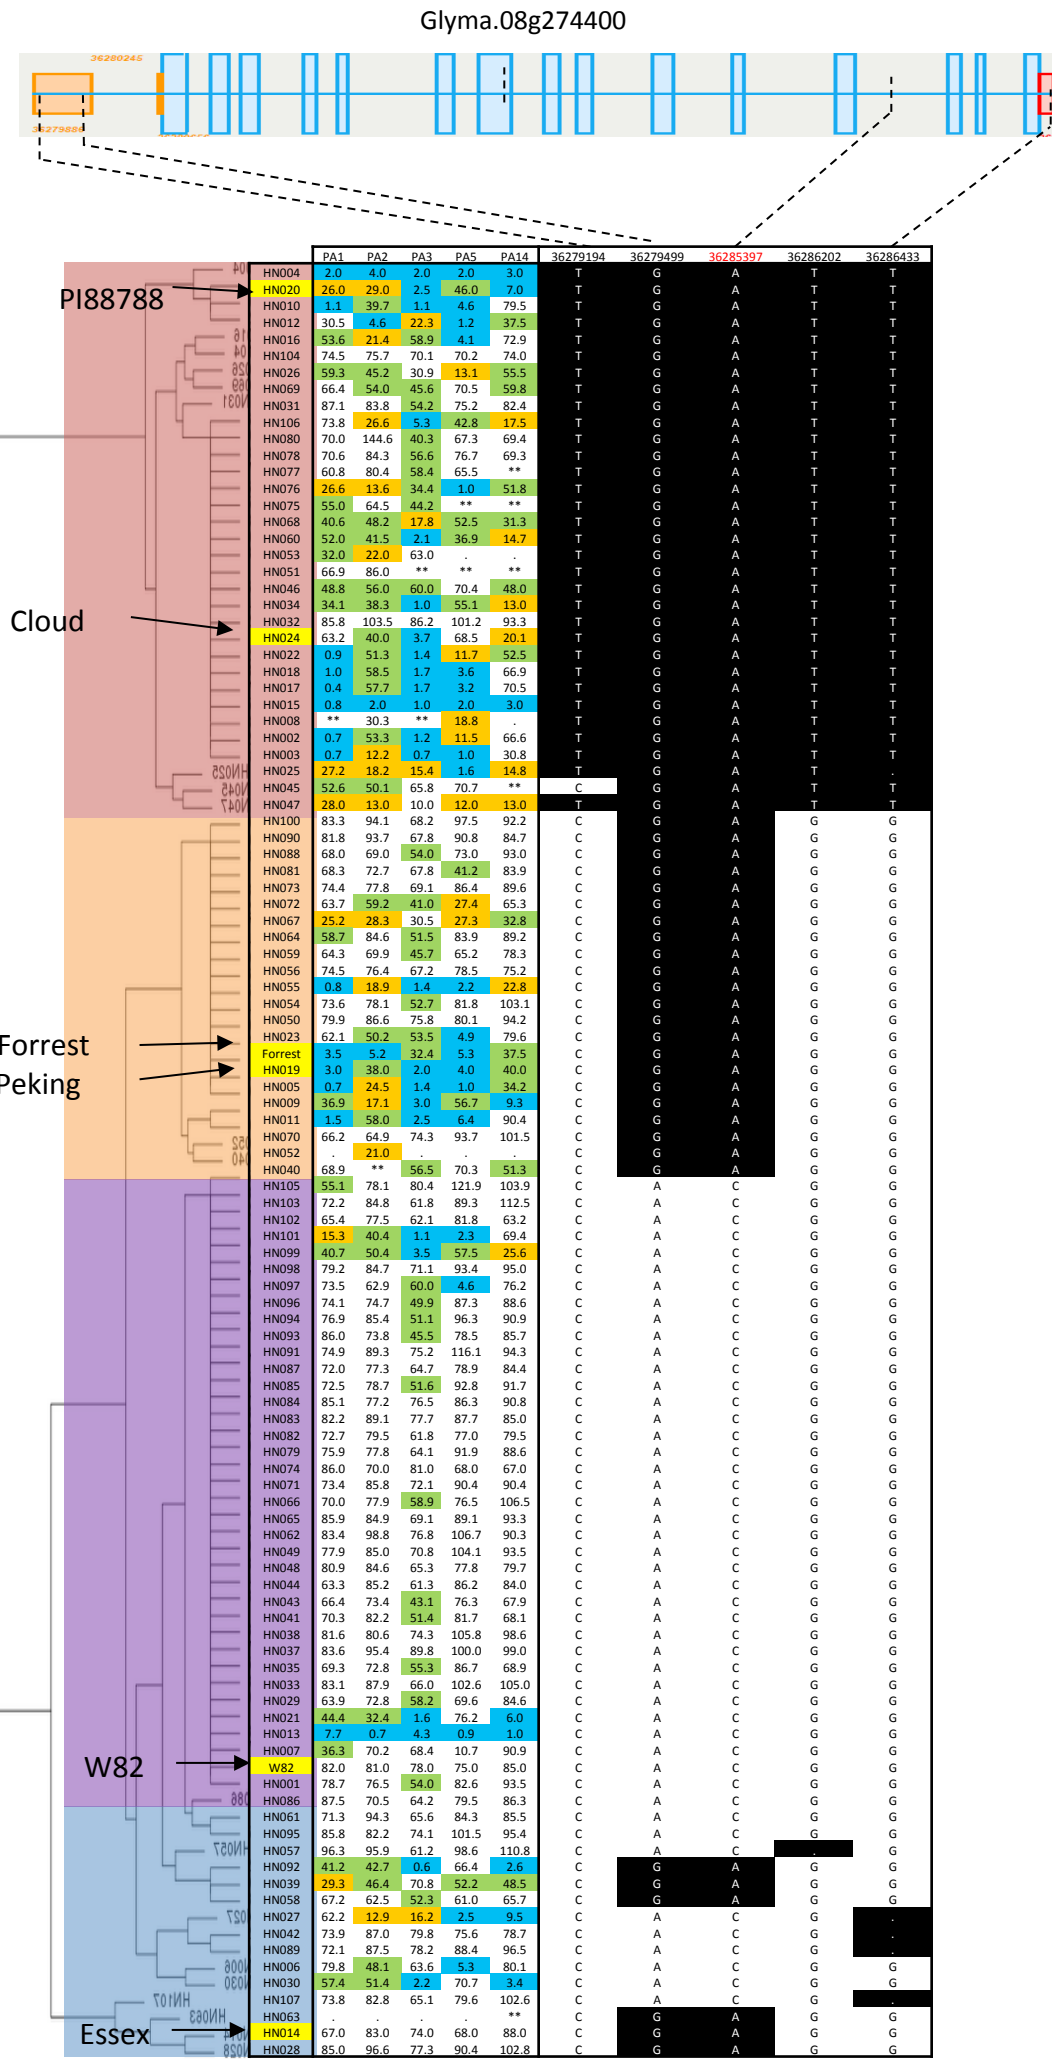

**Supplementary Figure S14. Haplotype clustering and correlation with soybean cyst nematode female index of the mitochondrial-localized *GmSHMT08m* in the 106 soybean lines.** The 106 soybean lines included non-domesticated; semi-domesticated, and elite domesticated introductions belonging to the USDA soybean collection. Schematic graphs shows the position of SNP/indel for *Glyma.08g274400* (*GmSHMT08m*) gene. SNP in black background were specific to Peking-type of resistance, and clustered with soybean lines carrying resistance to three SCN Hg-types; 0, 2.7, and 2.5.7. Blue box represents exon, blue bar represents intron, orange box represents promoter region, grey box represents 3' or 5' UTR. SNPs were positioned relative to the genomic position in W82. SNP position in red text showing non-synonymous SNPs leading to amino acid change. Female Index in blue (FI<10, resistant to SCN), in green (10<FI<30, Moderate resistance), in orange (30<FI<60, Moderate susceptibility), in white (60<FI, Susceptible to SCN).



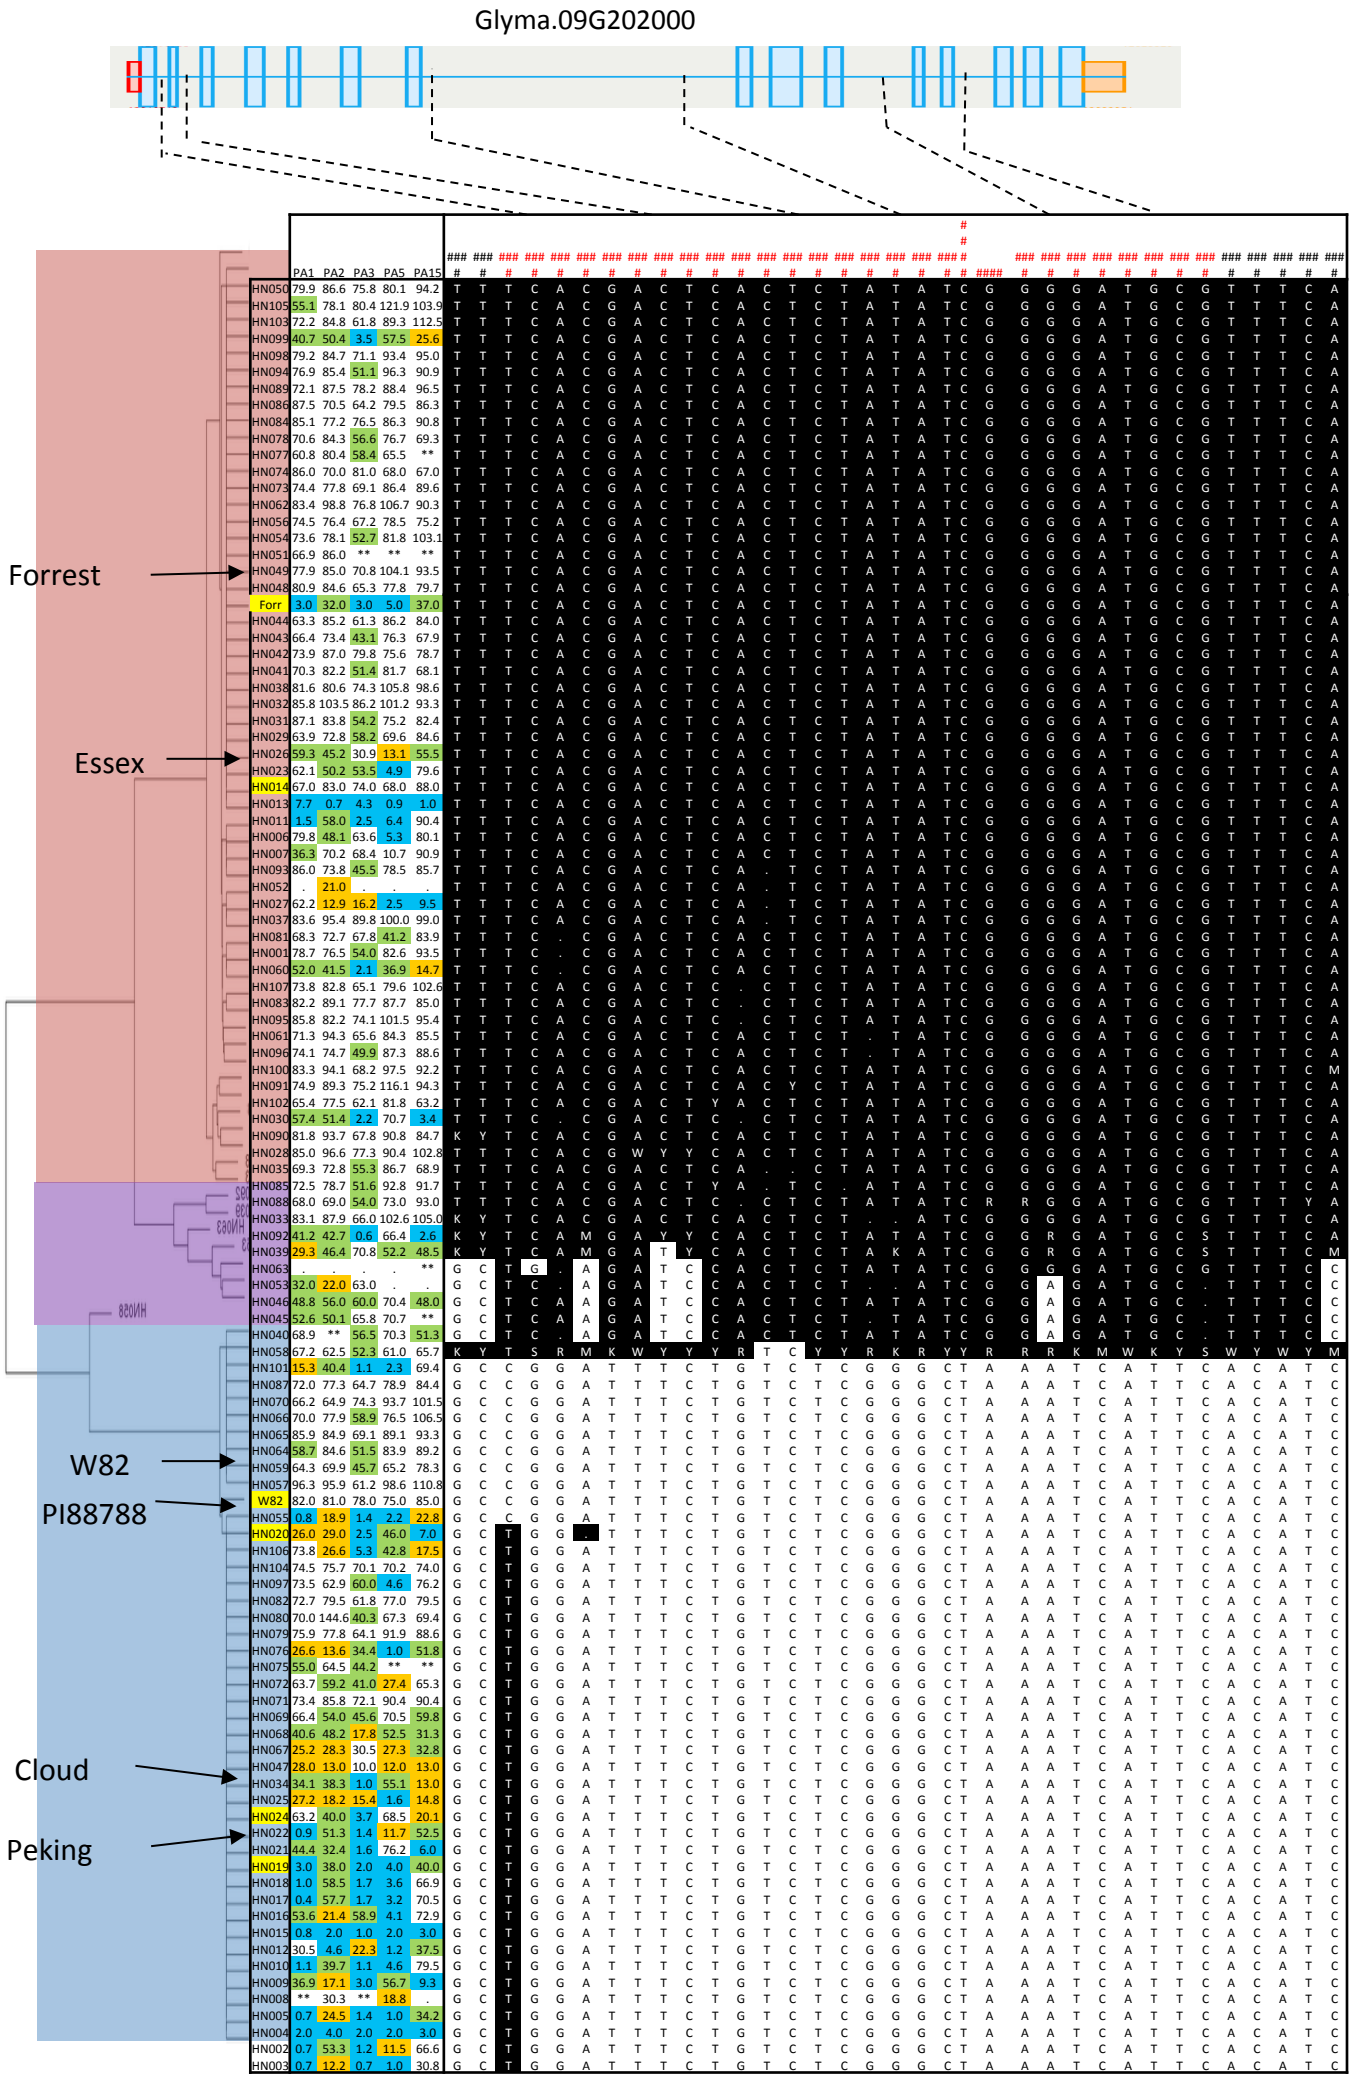

**Supplementary Figure S15. Haplotype clustering and correlation with soybean cyst nematode female index of the mitochondrial-localized *GmSHMT09m* in the 106 soybean lines.** The 106 soybean lines included non-domesticated; semi-domesticated, and elite domesticated introductions belonging to the USDA soybean collection. Schematic graphs shows the position of SNP/indel for *Glyma.09g217100* (*GmSHMT09m*) gene. SNP in black background were specific to Peking-type of resistance, and clustered with soybean lines carrying resistance to three SCN Hg-types; 0, 2.7, and 2.5.7. Blue box represents exon, blue bar represents intron, orange box represents promoter region, grey box represents 3' or 5' UTR. SNPs were positioned relative to the genomic position in W82. SNP position in red text showing non-synonymous SNPs leading to amino acid change. Female Index in blue (FI<10, resistant to SCN), in green (10<FI<30, Moderate resistance), in orange (30<FI<60, Moderate susceptibility), in white (60<FI, Susceptible to SCN).



Glyma.14g184500

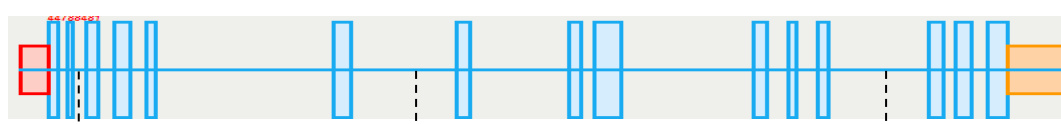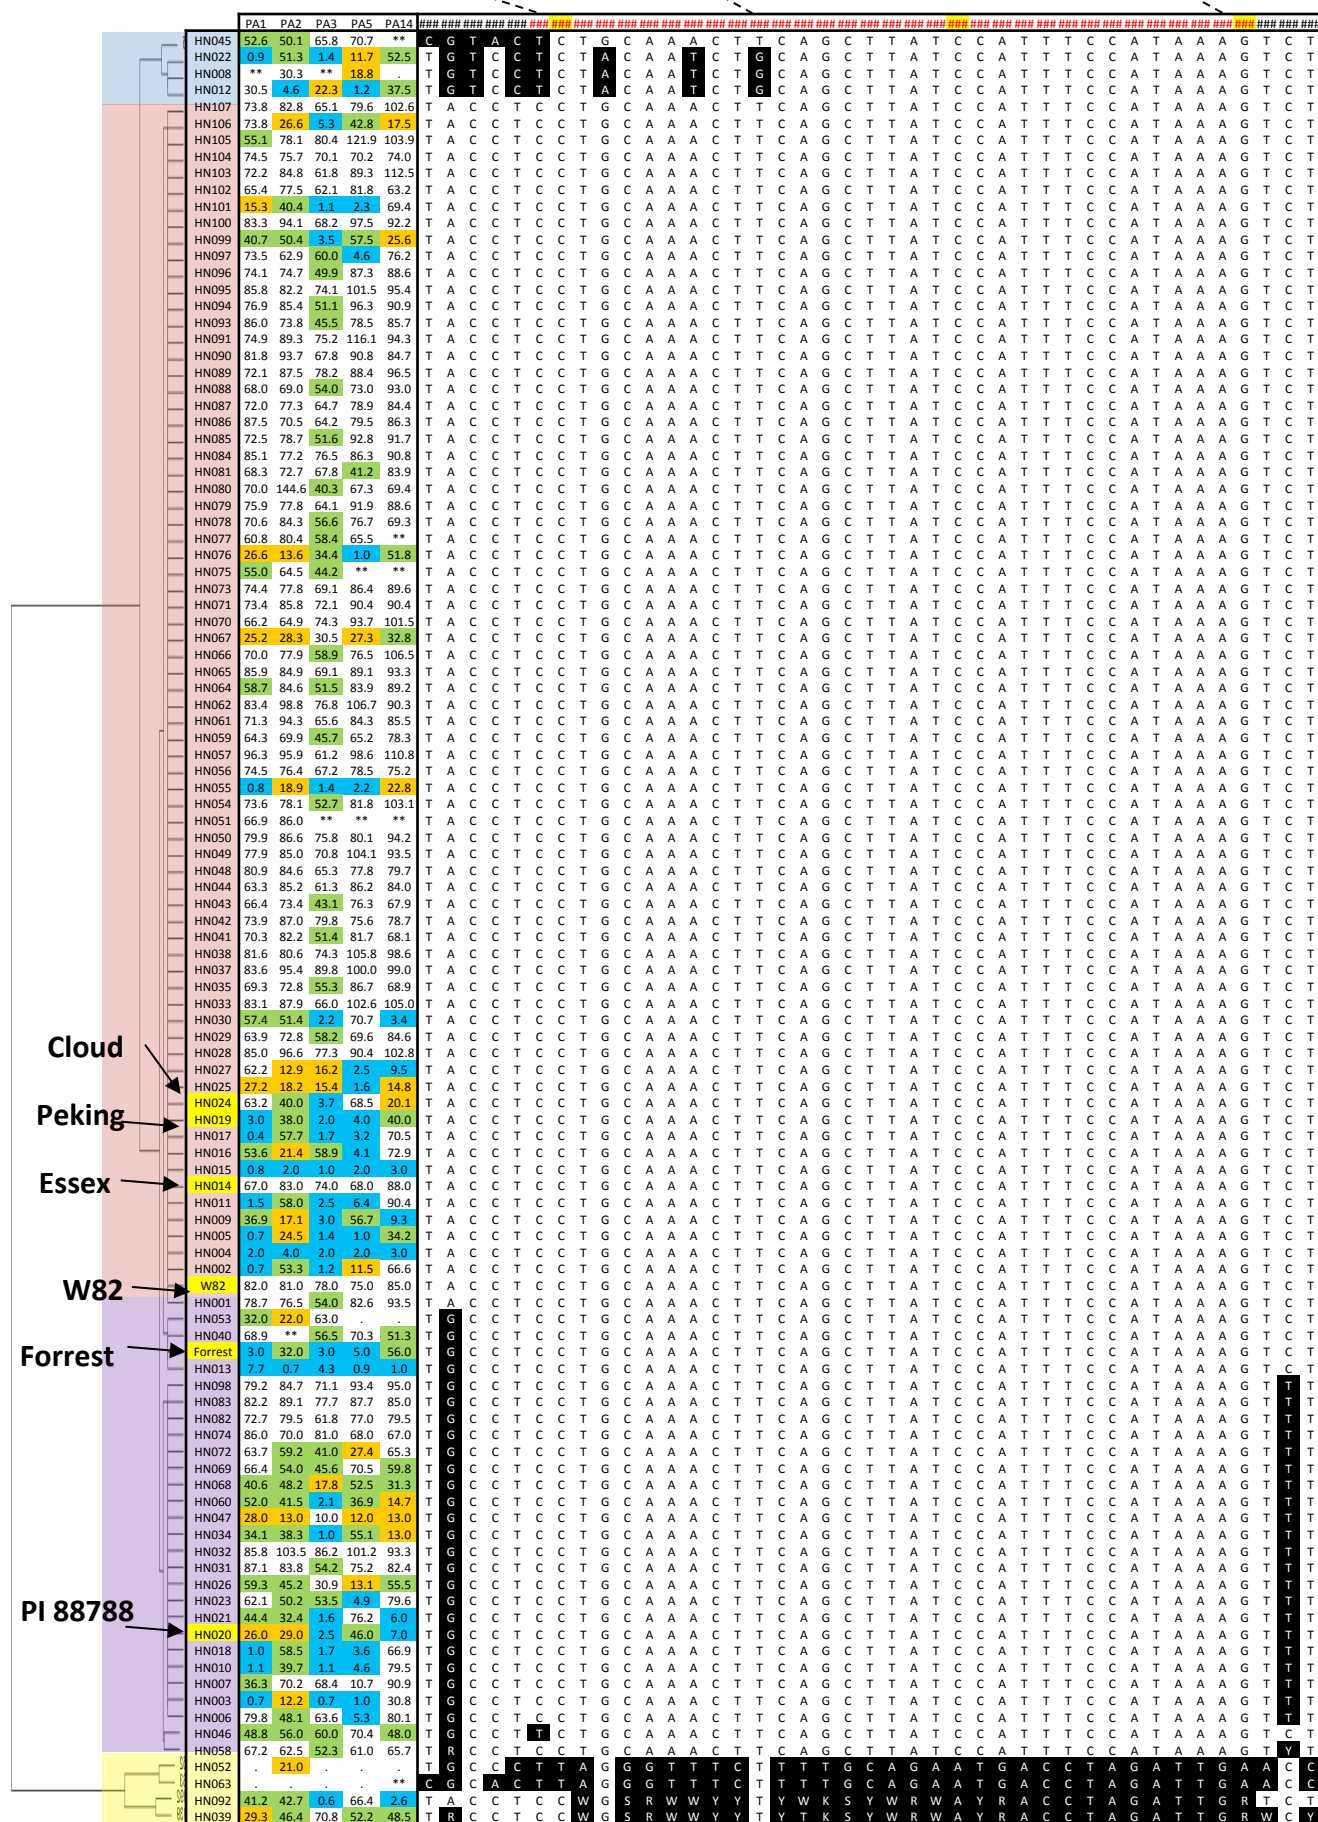

**Supplementary Figure S17. Haplotype clustering and correlation with soybean cyst nematode female index of the mitochondrial-localized *GmSHMT14m* in the 106 soybean lines.** The 106 soybean lines included non-domesticated; semi-domesticated, and elite domesticated introductions belonging to the USDA soybean collection. Schematic graphs shows the position of SNP/indel for *Glyma.14g184500* (*GmSHMT14m*) gene. SNP in black background were specific to Peking-type of resistance, and clustered with soybean lines carrying resistance to three SCN Hg-types; 0, 2.7, and 2.5.7. Blue box represents exon, blue bar represents intron, orange box represents promoter region, grey box represents 3' or 5' UTR. SNPs were positioned relative to the genomic position in W82. SNP position in red text showing non-synonymous SNPs leading to amino acid change. Female Index in blue (FI<10, resistant to SCN), in green (10<FI<30, Moderate resistance), in orange (30<FI<60, Moderate susceptibility), in white (60<FI, Susceptible to SCN).

**Supplemental Table S1.** *GmSHMTs* intragenome syntenic relationship calculations showing independent duplicate blocks containing the genomic pairs of *GmSHMT* family members with their corresponding number of conserved genes or anchors. Soybean genome duplicated chromosomal segments containing *GmSHMTs* were calculated using the Plant Genome Duplication.

| Gene A     | Chromosome | Length (AA) | Locus position (Mb) | Gene B     | Chromosome | Length (AA) | Locus position (Mb) | Score   | E-Value | Block | Ka   | Ks   | Ka/Ks | Conserved Anchors |
|------------|------------|-------------|---------------------|------------|------------|-------------|---------------------|---------|---------|-------|------|------|-------|-------------------|
| GmSHMT06n  | Ch06       | 584         | 8.46-8.86           | GmSHMT04n  | Ch04       | 603         | 51.90-52.30         | 28247.0 | 7e-172  | huge  | 0.02 | 0.17 | 0.11  | <b>711</b>        |
| GmSHMT08c  | Ch08       | 471         | 8.16-8.56           | GmSHMT05c  | Ch05       | 479         | 34.36-34.76         | 21948.0 | 2e-135  | huge  | 0.02 | 0.20 | 0.1   | 551               |
| GmSHMT13ch | Ch13       | 536         | 33.32-33.72         | GmSHMT15ch | Ch15       | 244         | 6.72-7.12           | 15580   | 3e-37   | large | 0.02 | 0.12 | 0.16  | 391               |
| GmSHMT02m  | Ch02       | 514         | 40.20-40.60         | GmSHMT14m  | Ch14       | 507         | 44.59-44.99         | 9852.0  | 2e-158  | huge  | 0.02 | 0.10 | 0.16  | 248               |
| GmSHMT08m  | Ch08       | 518         | 36.08-36.48         | GmSHMT09m  | Ch09       | 517         | 42.42-42.82         | 921.0   | 0.0     | large | 0.07 | 0.53 | 0.13  | 24                |
| GmSHMT08n  | Ch08       | 566         | 14.86-15.26         | GmSHMT12n  | Ch12       | 563         | 32.31-32.71         | 558.0   | 0.0     | large | 0.01 | 0.16 | 0.06  | <b>14</b>         |
| GmSHMT08m  | Ch08       | 518         | 36.08-36.48         | GmSHMT02m  | Ch02       | 514         | 40.20-40.60         | 361.0   | 1e-52   | Small | 0.11 | 1.64 | 0.06  | <b>10</b>         |
| GmSHMT02m  | Ch02       | 514         | 40.20-40.60         | GmSHMT18m  | Ch18       | 518         | 27.04-27.44         | 226.0   | 3e-137  | Small | 0.10 | 1.88 | 0.05  | <b>7</b>          |
| GmSHMT13m  | Ch13       | 363         | 18.24-18.44         | GmSHMT14m  | Ch14       | 507         | 32.81-33.01         | 929.0   | 0.0     | large | 0.16 | 0.29 | 0.55  | <b>24</b>         |

**Supplementary Table S2.** Number of *SHMT* genes identified in select algae, moss, lycophyte, basal angiosperms, monocotyledonous, and dicotyledonous species available in *Phytozome* ([www.phytozome.net](http://www.phytozome.net)). Number of Exons in mitochondrial, chloroplastic, nucleic, and cytosolic targeted SHMTs from all analyzed species is shown.

| Species                           | Number of SHMTs | Number of Exons |             |         |         |
|-----------------------------------|-----------------|-----------------|-------------|---------|---------|
|                                   |                 | Mitochondrion   | Chloroplast | Nucleic | Cytosol |
| <b><u>Green Algae</u></b>         |                 |                 |             |         |         |
| <i>Chlamydomonas reinhardtii</i>  | 3               | 16              | 12          |         | 8       |
| <b><u>Moss</u></b>                |                 |                 |             |         |         |
| <i>Physcomitrella patens</i>      | 14              | 14              | 11          | 4       | 2       |
| <b><u>Lycophyte</u></b>           |                 |                 |             |         |         |
| <i>Selaginella moellendorffii</i> | 4               | 15              | 10          | 4       | 4       |
| <b><u>Basal Angiosperm</u></b>    |                 |                 |             |         |         |
| <i>Amborella trichopoda</i>       | 8               | 15              | 7           | 4       | 4       |
| <b><u>Monocotyledons</u></b>      |                 |                 |             |         |         |
| <i>Hordeum vulgare</i>            | 3               | 15              | –           | 4       | 4       |
| <i>Brachypodium distachyon</i>    | 4               | 15              | –           | 4       | 4       |
| <i>Sorghum bicolor</i>            | 4               | 15              | –           | 4       | 4       |
| <i>Oryza sativa</i>               | 5               | 15              | –           | 4       | 4       |
| <i>Setaria italica</i>            | 5               | 15              | –           | 4       | 4       |
| <i>Panicum hallii</i>             | 5               | 15              | –           | 4       | 4       |
| <i>Panicum virgatum</i>           | 8               | 15              | –           | 4       | 4       |
| <i>Triticum aestivum</i>          | 13              | 15              | –           | 4       | 4       |
| <i>Zea mays</i>                   | 13              | 15              | –           | 4       | 4       |
| <b><u>Dicotyledons</u></b>        |                 |                 |             |         |         |
| <i>Carica papaya</i>              | 5               | 15              | 9           | 4       | 4       |
| <i>Citrus sinensis</i>            | 6               | 15              | 11          | 4       | 4       |
| <i>Cucumis sativus</i>            | 6               | 15              | 11          | 4       | 4       |
| <i>Arabidopsis thaliana</i>       | 7               | 15              | 11          | 4       | 4 or 3  |
| <i>Solanum lycopersicum</i>       | 7               | 15              | 11          | 4       | 4       |
| <i>Capsella rubella</i>           | 7               | 15              | 11          | 4       | 4       |
| <i>Fragaria vesca</i>             | 8               | 15              | 11          | 4       | 4       |
| <i>Prunus persica</i>             | 8               | 15              | 11          | 4       | 4       |
| <i>Populus trichocarpa</i>        | 9               | 15              | 11          | 4       | 4       |
| <i>Eucalyptus grandis</i>         | 10              | 15              | 11          | 4       | 4       |
| <i>Solanum tuberosum</i>          | 11              | 15              | 11          | 4       | 4       |
| <i>Vitis vinifera</i>             | 11              | 15              | 11          | 4       | 4       |
| <i>Medicago truncatula</i>        | 12              | 15              | 11          | 4       | 4       |
| <i>Glycine max</i>                | 18              | 15              | 11          | 4       | 4 or 3  |

**Supplementary Table S3.** Primers used for genotyping, expression (qRT-PCR), cloning, subcellular localization, sequencing and EcoTILLING.

| Gene         | Gene model    | Primers         | Primer Sequences                  | Purpose                  |
|--------------|---------------|-----------------|-----------------------------------|--------------------------|
| GmSHMT08c    | Glyma08g11490 | GmSHMT08-RT-Fw  | TAACCTCGCCGTGTTCCCTT              | qRT-PCR                  |
|              |               | GmSHMT08-RT-Rv  | TGTTTCGCGTAGGCCTTAAA              |                          |
|              |               | GmSHMT08-Fw     | ACAACACTCTCTCTCTCGC               | Genotyping               |
|              |               | GmSHMT08-Rv     | CAGATTATGAGTTTTGGCCTG             |                          |
|              |               | GmSHMT05-RT-Fw  | GTTAATAAGAACGCAGTTT               | qRT-PCR                  |
|              |               | GmSHMT05-RT-Rv  | CAATTCTGATAAGAGAACAGT             |                          |
| GmSHMT05c    | Glyma05g28490 | GmSHMT05-Fw1    | GCACACATAGGCACTGGGCAC             | Genotyping               |
|              |               | GmSHMT05-Rv1    | CTTATCCGCAATTTCCCTGAAGC           |                          |
|              |               | GmSHMT05-Fw2    | AAACGCTTCAGGGAAATTGCGG            | Genotyping               |
|              |               | GmSHMT05-Rv2    | GCAAGATCTGTATTCTAGCACATAAAAAG     |                          |
|              |               | GmSHMT05-Fw3    | GCGAATTGGTAACCAACTTATTTC          | Genotyping               |
|              |               | GmSHMT05-Rv3    | ATAAACCCCTACCCCTCCCAGAATGG        |                          |
|              |               | GmSHMT05-SL-Fw  | TATAAAGCTTTTAAAGACGCACACATAGGCAC  | Subcellular Localization |
|              |               | GmSHMT05-SL-Rv  | TATAGTCGACTATCCTTGTACTTCAITTCAGA  |                          |
| GmSHMT06n    | Glyma06g11300 | GmSHMT06-RT-Fw  | GCAGCAGGTGAAGAGAAATGC             | qRT-PCR                  |
|              |               | GmSHMT06-RT-Rv  | TGACACGCCTCACAGACCTTT             |                          |
|              |               | GmSHMT06-SL-Fw  | TATAGAATTCATGGACTCCCAACCGGGTCTC   | Subcellular Localization |
|              |               | GmSHMT06-SL-Rv  | TATAGTCGACTAATATCGAATCCTGGCATTGC  |                          |
| GmSHMT04n    | Glyma04g43360 | GmSHMT04-RT-Fw  | GGCAGCTCAGATTACCAGCAT             | qRT-PCR                  |
|              |               | GmSHMT04-RT-Rv  | ATATCGAAGCCTGGCATTGC              |                          |
| GmSHMT12n    | Glyma12g29171 | GmSHMT12-RT-Fw  | GTTGTGCCCGCTTTTACAAA              | qRT-PCR                  |
|              |               | GmSHMT12-RT-Rv  | ATGATGCCACGATCCAAACC              |                          |
| GmSHMT08n    | Glyma08g20050 | GmSHMT08b-RT-Fw | TGCAGCTGTCAGGTTTTACA              | qRT-PCR                  |
|              |               | GmSHMT08b-RT-Rv | ATGCATTAGCTGGGATGGT               |                          |
|              |               | GmSHMT08b-SL-Fw | TATAGAATTCATGGACTCTCTCACCCCTCAA   | Subcellular Localization |
|              |               | GmSHMT08b-SL-Rv | TATAGTCGACTAATGTCAAAAACCCGGCATGGC |                          |
| GmSHMT14m    | Glyma14g36280 | GmSHMT14-RT-Fw  | GGTTCCTGGAGGCATTCTGA              | qRT-PCR                  |
|              |               | GmSHMT14-RT-Rv  | AACCTTGACAGCCGATCAAAG             |                          |
| GmSHMT02m    | Glyma02g38160 | GmSHMT02-RT-Fw  | GCAAAAAGGAGGTGCAACACTT            | qRT-PCR                  |
|              |               | GmSHMT02-RT-Rv  | TGGTGCAGATGCTAGCTTTACA            |                          |
| GmSHMT08m    | Glyma08g37270 | GmSHMT08c-RT-Fw | GGGAGAGAGCAAAGGAACAAAAG           | qRT-PCR                  |
|              |               | GmSHMT08c-RT-Rv | TTCTTGTGCTTCATGGTTGCTT            |                          |
| GmSHMT13ch   | Glyma13g29410 | GmSHMT08c-RT-Fw | CCTAGTTCCAGGAGGCATTTCG            | qRT-PCR                  |
|              |               | GmSHMT08c-RT-Rv | CTTGGAGCTTCGTTCTGAGA              |                          |
| GmSHMT18m    | Glyma18g27710 | GmSHMT18-RT-Fw  | GGGAACCCCTGCTCTTACTTCT            | qRT-PCR                  |
|              |               | GmSHMT18-RT-Rv  | TGGCGGAGCTTTGCTATCTC              |                          |
| GmSHMT09m    | Glyma09g33480 | GmWEMBL-RT-Fw   | GGATTGCTGAGGAGGATTTTG             | qRT-PCR                  |
|              |               | GmWEMBL-RT-Rv   | GGCGAAGCTTTGCAATCTCT              |                          |
| Gm-Ubiquitin | Glyma20g27950 | GmUBI20-RT-Fw   | GTGTAATGTTGGATGTGTTCCC            | qRT-PCR                  |
|              |               | GmUBI20-RT-Rv   | ACACAATTGAGTTCAACACAAACCG         |                          |

**Supplementary Table S4.** The GenBank accessions of the serine hydroxymethyltransferase (SHMT; EC 2.1.2.1) alleles deposited at NCBI

| <b>Line</b>       | <b>Amino acid change</b> | <b>GenBank accession</b> |
|-------------------|--------------------------|--------------------------|
| SHMT08_F6266      | E61K                     | KX881924                 |
| SHMT08_F6756      | M125I                    | KX881925                 |
| SHMT08_F1927      | G132D                    | KX881926                 |
| SHMT08_F1817      | R257Q                    | KX881927                 |
| SHMT08_F1336      | L299F                    | KX881928                 |
| SHMT08_F1801      | N368T                    | KX881929                 |
| SHMT08_F891       | A302V                    | KX881930                 |
| SHMT08_F427       | G71D                     | KX881931                 |
| SHMT08_F1460      | G326E                    | KX881932                 |
| SHMT08_Forrest_WT | -                        | KX881923                 |
| SHMT08_Essex_WT   | -                        | KX881933                 |
